24 dinosaurs. One of the most bizarre characters is the absence of an antorbital fenestra (Fig.  
25 1a, b). Xing et al.<sup>1</sup> argued the antorbital fenestra fused with the orbit, but they reported the  
26 lacrimal is present at the anterior margin of the orbit<sup>1</sup>. This contradicts the definition of  
27 the lacrimal in all archosaur including birds since lacrimal always forms the caudal  
28 margin of the antorbital fenestra<sup>2</sup>. In addition, a separate antorbital fenestra is a stable  
29 character among archosaurs including non-avian dinosaurs and most birds<sup>3-5</sup>, and all the  
30 known Cretaceous birds do have a separate antorbital fenestra<sup>6</sup>.

31 Another highly questionable feature in *Oculudentavis* is the maxilla extending  
32 caudally to the level of mid-orbit and forming half of the ventral margin of the orbit (Fig.  
33 1b), which is extremely unusual in Aves. In most crown birds, the maxilla terminates  
34 anterior to the orbit. The ventral margin of the orbit is formed by the jugal<sup>2,7</sup>. This is also  
35 the condition among Mesozoic birds, including *Archaeopteryx*<sup>5,8,9</sup>, *Sapeornis*<sup>10</sup>,  
36 enantiornithines<sup>6</sup> and ornithuromorphs<sup>6</sup>. In *Ichthyornis*, maxilla is elongate and extends  
37 further caudally beneath the jugal<sup>11</sup> which means the ventral margin of the orbit is still  
38 mostly composed by the jugal, different from *Oculudentavis*. In addition, we need to note  
39 that the skull of *Jeholornis* was incorrectly reconstructed with a maxilla extending most  
40 of the orbit, followed by a shortened jugal<sup>1</sup>, which present a mislead similarity between  
41 the skull of *Oculudentavis* and *Jeholornis*. However, the maxilla of *Jeholornis* is short  
42 and most of the ventral margin of the orbit is formed by the elongate jugal followed by  
43 the quadratojugal<sup>6</sup>, in stark contrast with *Oculudentavis*.

44 In *Oculudentavis*, the maxillary tooth row extends caudally to the rostral half of the  
45 orbital. Among most Mesozoic birds, maxillary tooth row ends well cranially to the  
46 cranial margin of the orbit<sup>5,6</sup>. In contrast, at least four teeth are located beneath the ventral

47 margin of the orbital, and the last one even ends below the rostral third point of the orbit  
48 in *Oculudentavis*.

49 Although Xing et al. mentioned that the scleral ring and dentition of *Oculudentavis*  
50 resemble lizards<sup>1</sup>, they failed to recognize that pleurodont dentition is diagnostic for  
51 squamates<sup>12</sup>. The maxillary and dentary teeth are ankylosed to the jaw with their labial  
52 side (Fig. 1e), and replacement teeth develop posterolingual to the functional teeth. The  
53 authors also stated that the tooth implantation appears to be acrodont to pleurodont.  
54 However, there is no evidence for acrodonty based on our reexamination of the original  
55 CT scan data.

56 In comparison, dinosaurs have thecodont teeth that develop in tooth sockets, with  
57 replacement teeth developing beneath the functional teeth. Although the Late Cretaceous  
58 ornithuromorph bird *Hesperornis* retain teeth in a groove (tooth sockets fused together)<sup>13</sup>,  
59 it is clearly distinguishable from the pleurodont dentition in *Oculudentavis*. Non-  
60 archosaurian dentition of *Oculudentavis* has also been interpreted as the result of  
61 miniaturization<sup>1</sup>. To our best knowledge, there is no concrete evidence suggesting such a  
62 drastically change of dentition in miniaturized archosaurs. Pleurodont dentition falsifies  
63 the dinosaurian or even archosaurian affinity of *Oculudentavis* — instead it supports the  
64 squamate affinity of this new species.

65 Another unambiguous squamate synapomorphy in *Oculudentavis* is the loss of the  
66 lower temporal bar. In the original publication<sup>1</sup>, a complete orbit was illustrated on the  
67 left side of the skull with an unnamed piece of bone between the jugal and  
68 postorbitofrontal<sup>1</sup>. In addition, the anterior margin of the quadrate articulates with an  
69 unlabeled bone. The misleading illustration suggests that the quadratojugal might be

70 present in *Oculudentavis*. On the basis of the original CT scan data, we demonstrate that  
71 the orbit on the left side of the skull is crushed. The left jugal is not preserved. The right  
72 side of the skull preserves a complete orbital region, which shows the jugal has a smooth  
73 posterior margin, lacking contact with the quadrate. The quadratojugal is absent (Fig. 1a  
74 and b), which means the infratemporal fenestra is open in *Oculudentavis* – a condition  
75 shared with all squamates but not dinosaurs or birds<sup>12,14</sup>.

76 Additional morphologies of *Oculudentavis* that contradict its avian affinity include  
77 the presence of the parietal foramen (Fig. 1i), the separate ventral down growths of  
78 frontal (Fig. 1j), as well as palatal teeth present on palatine and pterygoid (Figs. 1d, k, and  
79 l)

80 *Oculudentavis* means “eye-tooth bird”, yet neither the eyes (scleral ring) nor the teeth  
81 suggest this new species was a bird. Xing et al<sup>1</sup> assigned this enigmatic animal to Aves  
82 based on superficial appearances, such as the exterior contour of the dome-shaped  
83 cranium and slender rostrum<sup>1</sup>. However, all the extended discussions, including the  
84 morphological changes related to miniaturization and the ocular morphology, lost their  
85 foundation with a problematic phylogenetic placement of this animal. In addition,  
86 multiple unambiguous characters support the squamate affinity of *Oculudentavis*,  
87 including the loss of quadratojugal, pleurodont marginal teeth, and presence of palatal  
88 teeth (Figs. 1 and 2). The original phylogenetic analysis by Xing et al. suffers from biased  
89 sampling of taxa<sup>1</sup>. Our new morphological discoveries suggest that lepidosaurs should be  
90 included in the phylogenetic analysis of *Oculudentavis*.

91

92 **References**

- 93 1 Xing, L. et al. Hummingbird-sized dinosaur from the Cretaceous period of  
94 Myanmar. *Nature* **579**, 245–249 (2020).
- 95 2 Baumel, J. J. & Witmer, L. M. in *Handbook of Avian anatomy: Nomina*  
96 *Anatomica Avium* (eds. J. J. Baumel, A. S. King, J. E. Breazile, H. E. Evans, and V.  
97 B. J. C.), 45–132 (Nuttall Ornithological Club, Cambridge, 1993).
- 98 3 Rauhut, O. W. The interrelationships and evolution of basal theropod dinosaurs.  
99 *Special Papers Palaeontol.* **69**, 1–213 (2003).
- 100 4 David, B. W., Peter, D. & Osmólska, H. *The Dinosauria* (Univ. California Press,  
101 2004).
- 102 5 Rauhut, O. W., Foth, C. & Tischlinger, H. The oldest *Archaeopteryx* (Theropoda:  
103 Avialiae): a new specimen from the Kimmeridgian/Tithonian boundary of  
104 Schamhaupten, Bavaria. *PeerJ* **6**:e4191 (2018).
- 105 6 Wang, M. & H. Hu. A comparative morphological study of the jugal and  
106 quadratojugal in early birds and their dinosaurian relatives. *Anat. Rec.* **300**, 62–75,  
107 (2017).
- 108 7 Livezey, B. C. & Zusi, R. L. Higher-order phylogeny of modern birds (Theropoda,  
109 Aves: Neornithes) based on comparative anatomy: I. methods and characters. *Bull*  
110 *Carnegie Mus. Nat. Hist.* **37**, 1–544 (2006).
- 111 8 Elzanowski, A. & Wellnhofer, P. Cranial morphology of *Archaeopteryx*: evidence  
112 from the seventh skeleton. *J. Vertebr. Paleontol.* **16**, 81–94 (1996).
- 113 9 Mayr, G., Pohl, B. & Peters, D. S. A well-preserved *Archaeopteryx* specimen  
114 with theropod features. *Science* **310**, 1483–1486 (2005).
- 115 10 Zhou, Z. & Zhang, F. Anatomy of the primitive bird *Sapeornis chaoyangensis*

- 116 from the Early Cretaceous of Liaoning, China. *Can. J. Earth Sci.* **40**, 731–747  
117 (2003).
- 118 11 Field, D. J. et al. Complete *Ichthyornis* skull illuminates mosaic assembly of the  
119 avian head. *Nature* **557**, 96–100 (2018).
- 120 12 Estes, R., Kevin, Q. & Gauthier, J. Phylogenetic relationships within Squamata.  
121 *Phylogenetic Relat. Lizard Fam.* 119–281 (1988).
- 122 13 Dumont, M. et al.. Synchrotron imaging of dentition provides insights into the  
123 biology of *Hesperornis* and *Ichthyornis*, the “last” toothed birds. *BMC Evol. Biol.*  
124 **16**, 1–28 (2016).
- 125 14. Gauthier, J. A. et al. Assembling the Squamate Tree of Life: perspectives from the  
126 phenotype and the fossil record. *Bull. Peabody Mus. Natural Hist.* **53**, 3–308  
127 (2012).

128

## 129 **Figure legends**

130 **Figure 1. Figure 1.** Reanalysis of the cranial anatomy of *Oculudentavis khaungraae*  
131 Xing et al. 2020<sup>1</sup> (holotype, HPG-15-3) based on the original computed tomography (CT)  
132 scan data. **a**, Three-dimensional CT reconstruction of the skull in right lateral view. **b**,  
133 Line drawing of the skull in right lateral view, showing the absence of quadratojugal in  
134 *Oculudentavis*. **c**, Skull in ventrolateral view. **d** and **e**, Two-dimensional CT slices  
135 through the palatine (**d**, showing a palatine tooth) and the dentary (**e**, showing a typical  
136 pleurodont tooth). **f** and **g**, Pterygoid tooth shown in three-dimensional reconstruction of  
137 the skull (**f**) and in a coronal plane through of the skull (**g**). **h**, Skull in dorsal view. **i**, A  
138 coronal CT slice through the skull roof showing the pineal foramen. **j**, Skull in ventral

139 view, with the lower jaw and palate removed to show the ventral surface of the frontal. **a-**  
140 **c**, scale bar: 2 mm; **d-j**, not to scale.

141

142 **Figure 2.** Simplified reptile family tree, illustrative drawings showing the comparison of  
143 the skull in *Oculudentavis*, squamate (green lizard *Lacerta bilineata*) and bird  
144 (Cretaceous bird *Sapeornis*).

145

### 146 **Methods and Data availability**

147 The original CT scan data was obtained upon request from the authors of original  
148 paper<sup>1</sup>. Two 3D format files (9.5G in total) were combined into one and re-rendered in  
149 Drishti 2.6.5 (<https://github.com/nci/drishti/releases>). Scan data were analyzed in Avizo  
150 ([www.thermofisher.com](http://www.thermofisher.com)) and imaged in Adobe photoshop ([www.adobe.com](http://www.adobe.com)). For more  
151 scanning, 3D reconstruction and data information see ref 1.

152

### 153 **Acknowledgement**

154 We thank G.L., J.K.O. and L.X. for providing the original CT scan data for  
155 reanalyzing. We thank colleagues at Institute of Vertebrate Paleontology and  
156 Paleoanthropology, Chinese Academy of Sciences for their great help during preparing  
157 and writing the manuscript.

158

### 159 **Author Contributions**

160 All authors designed the project, analyzed and discussed the data, and wrote the  
161 manuscript. All authors contributed equally.

162

163 **Competing Interests statement**

164           The authors declare no competing financial interests.



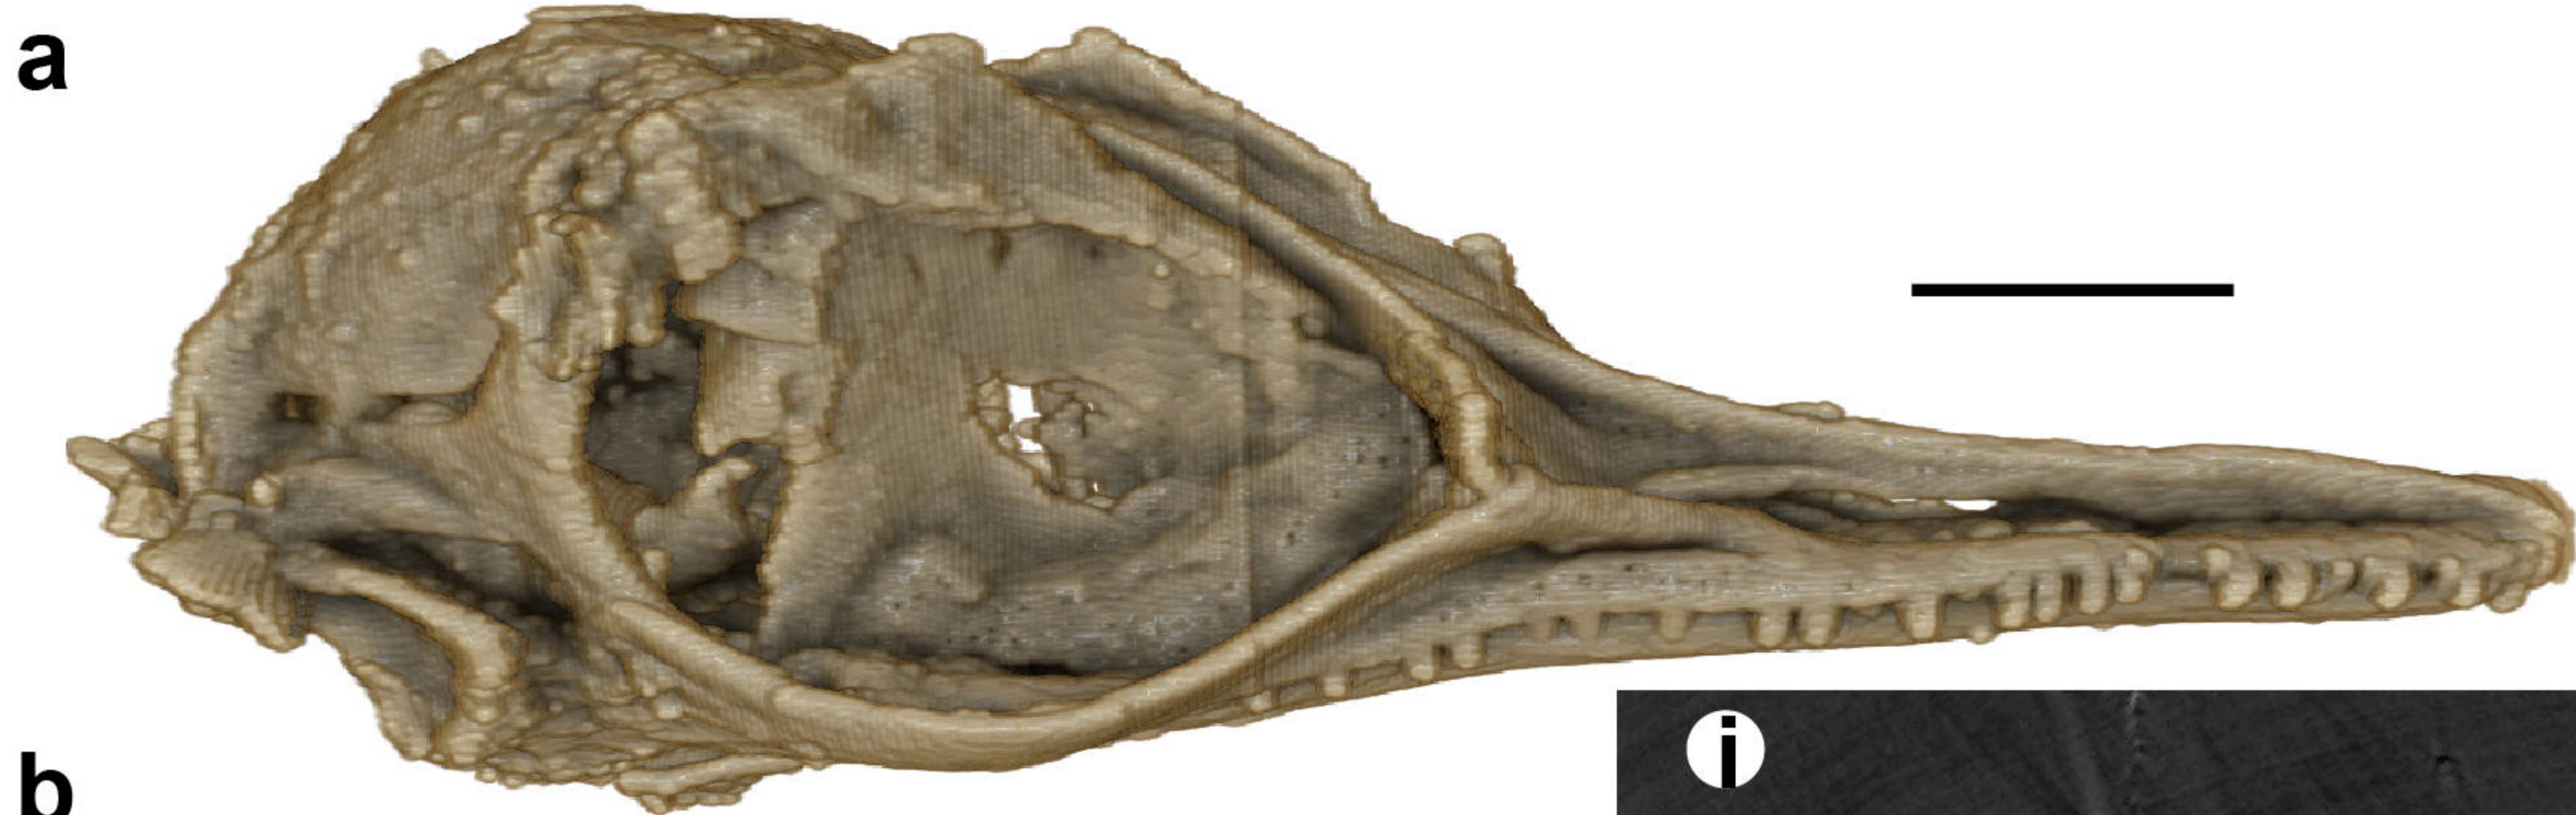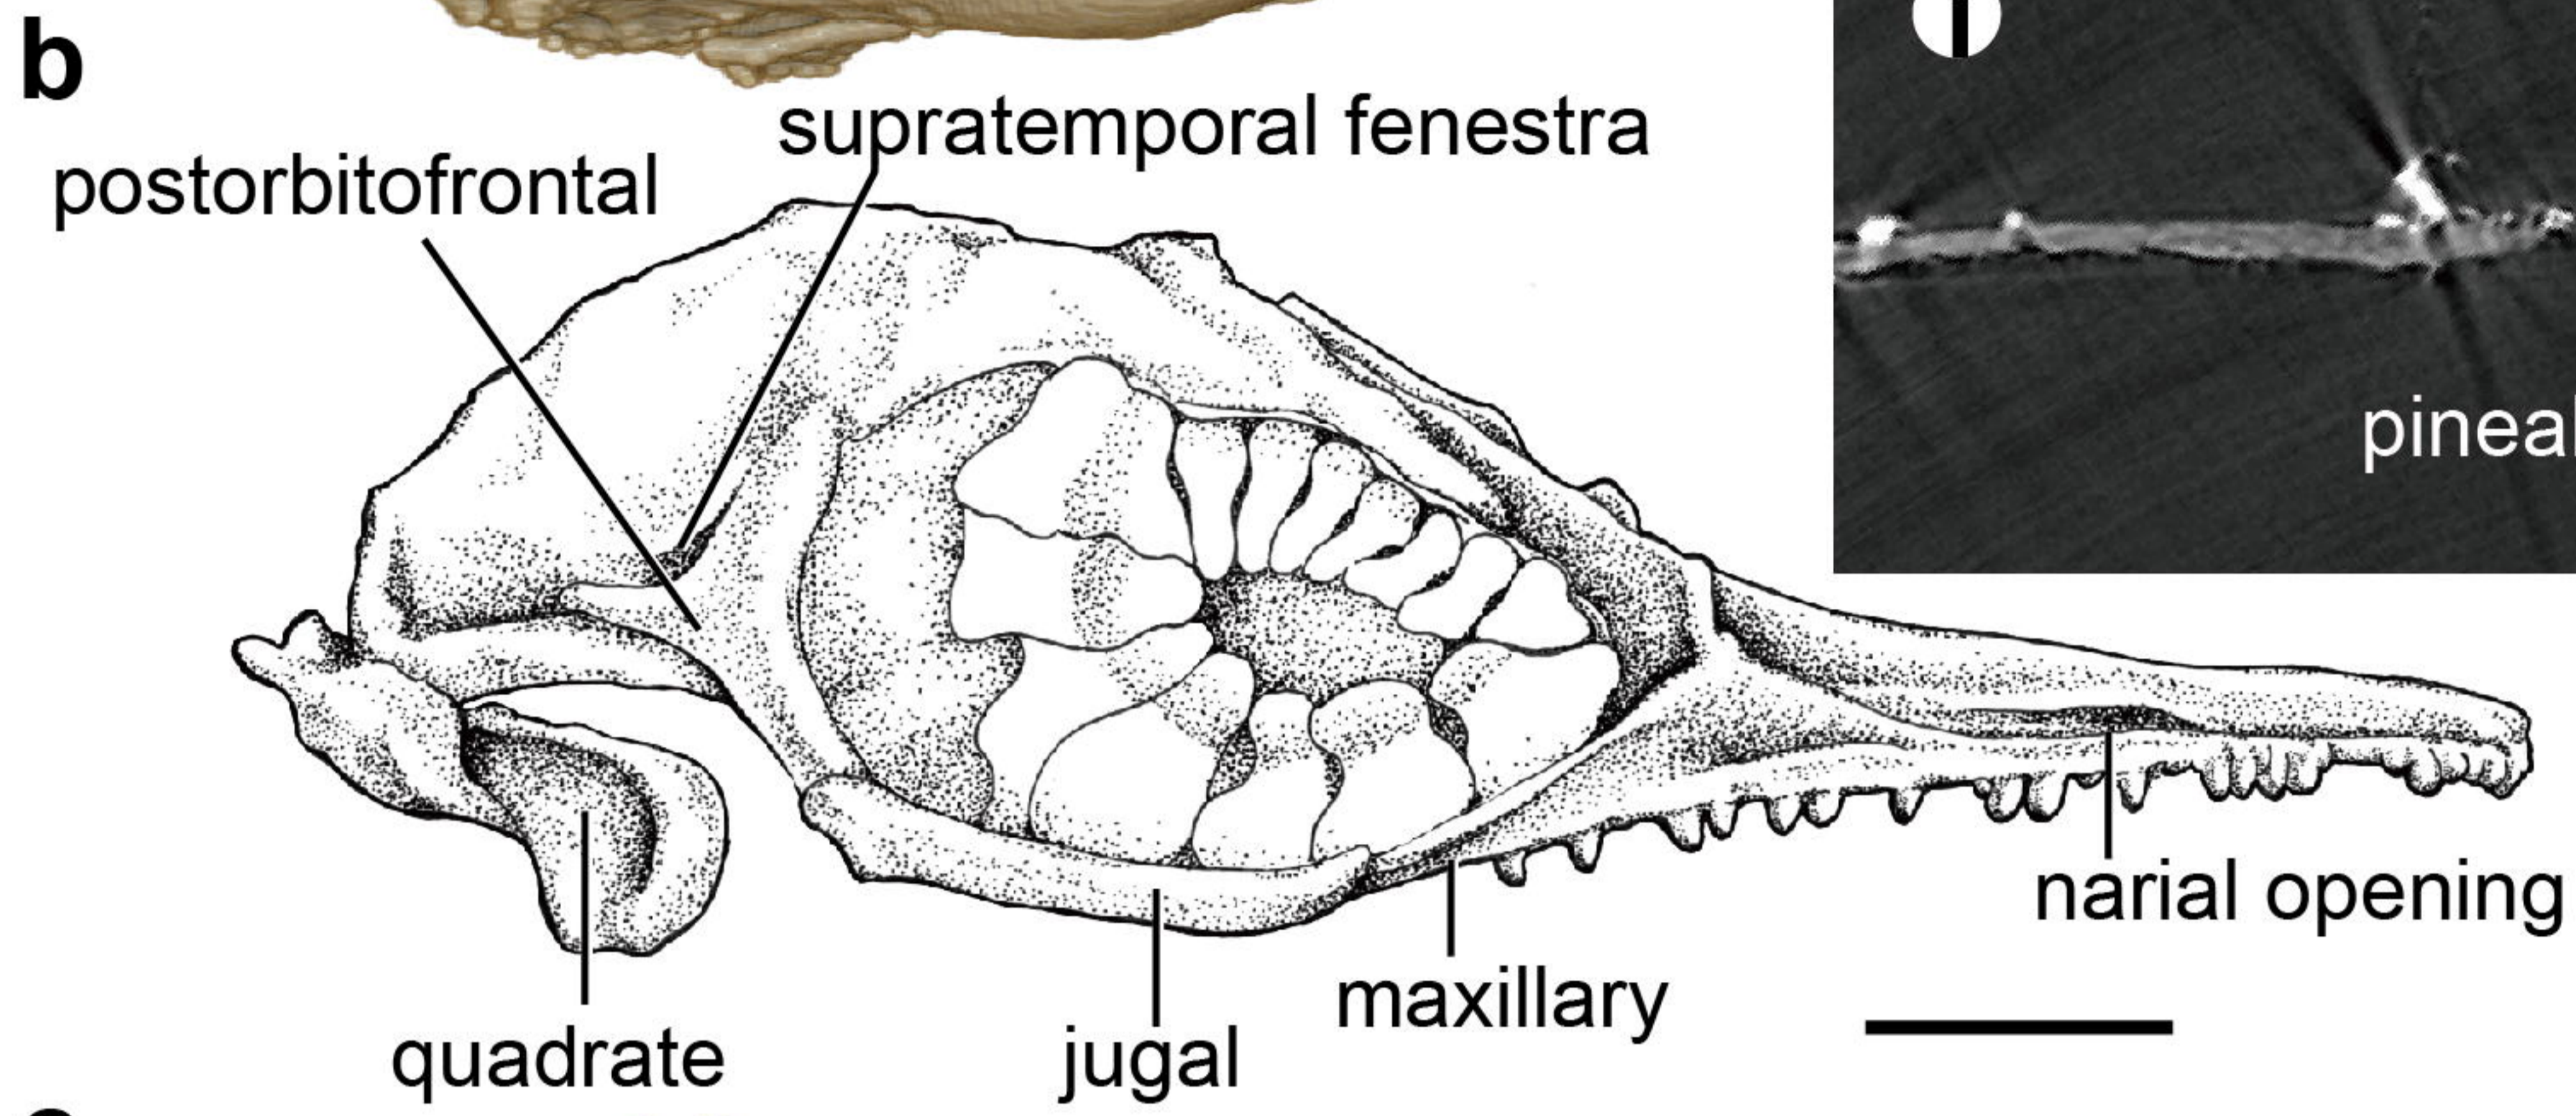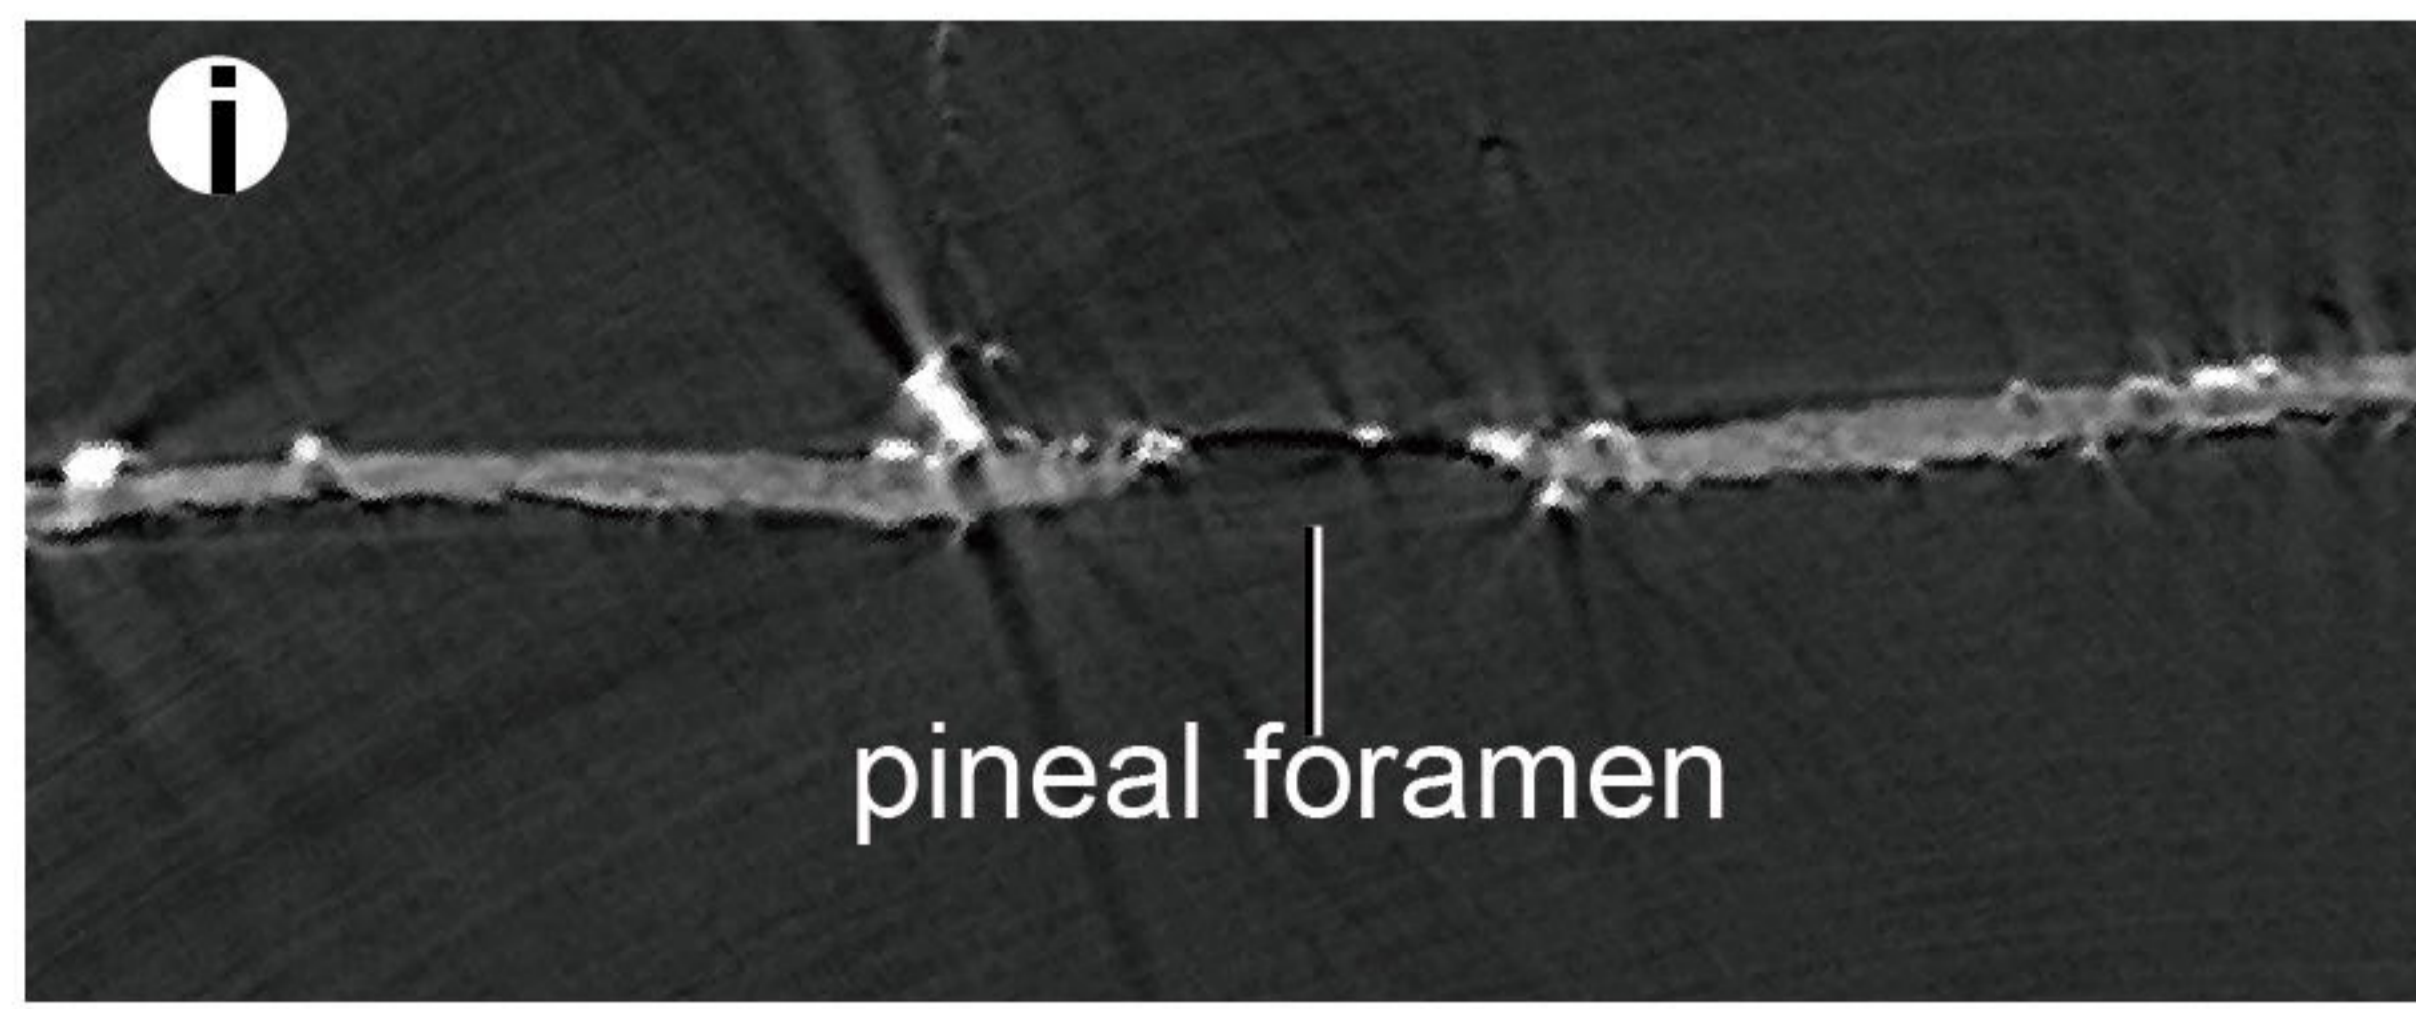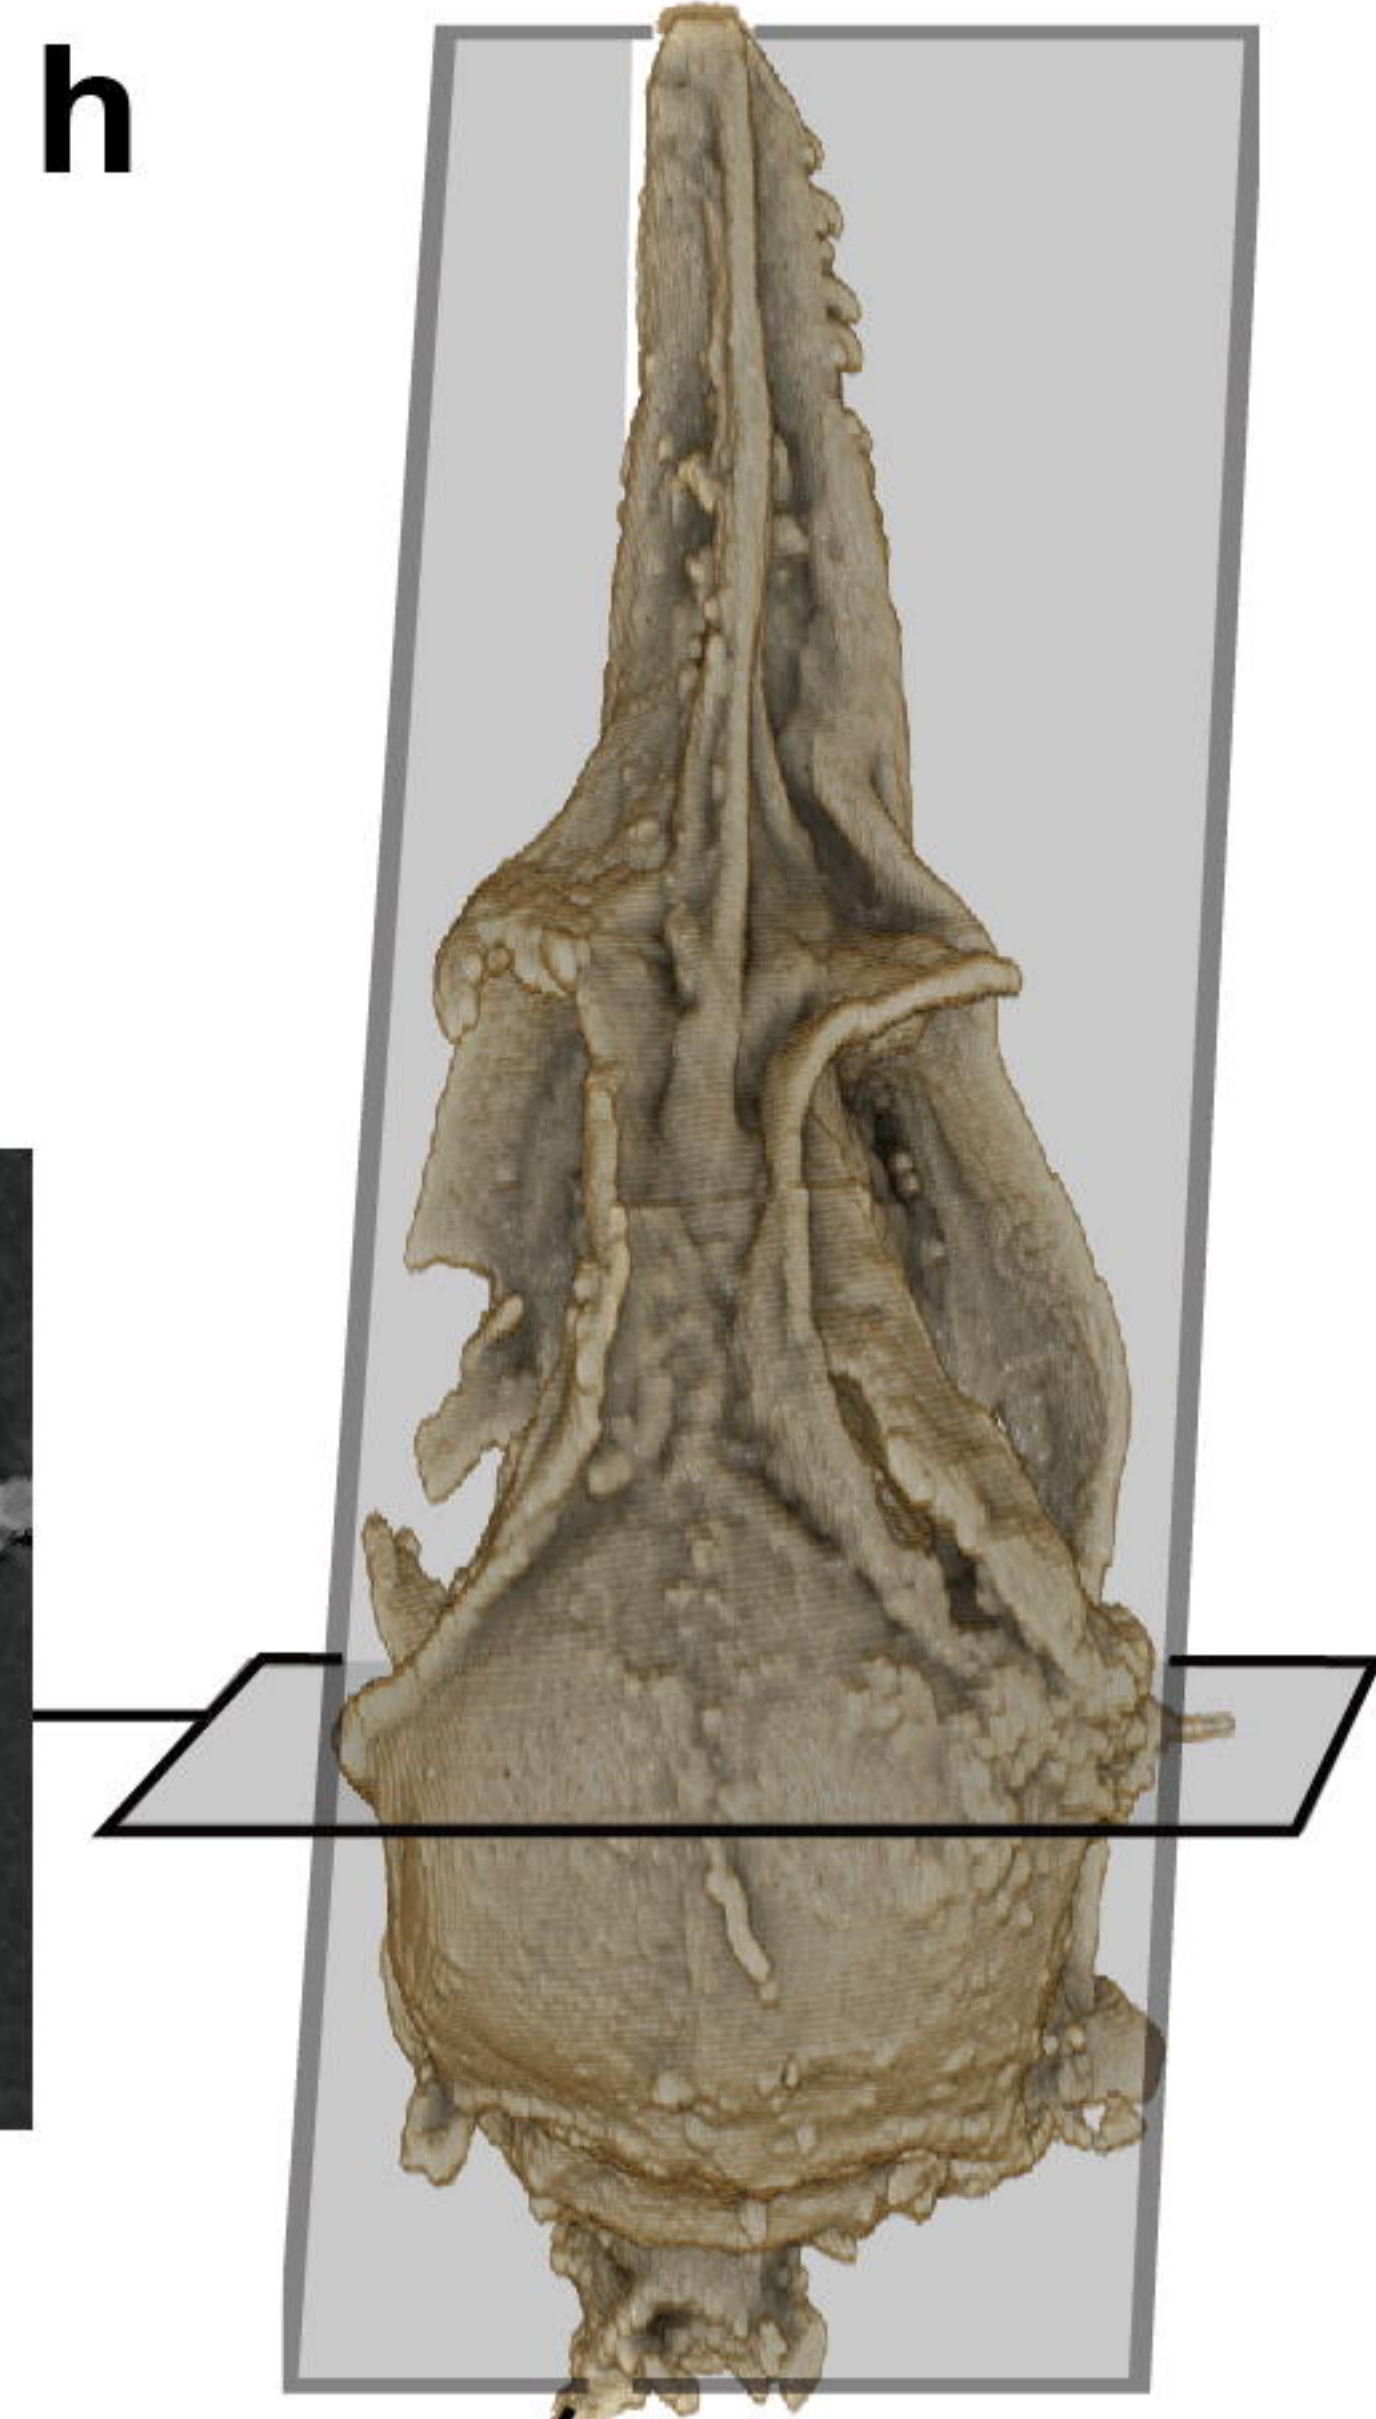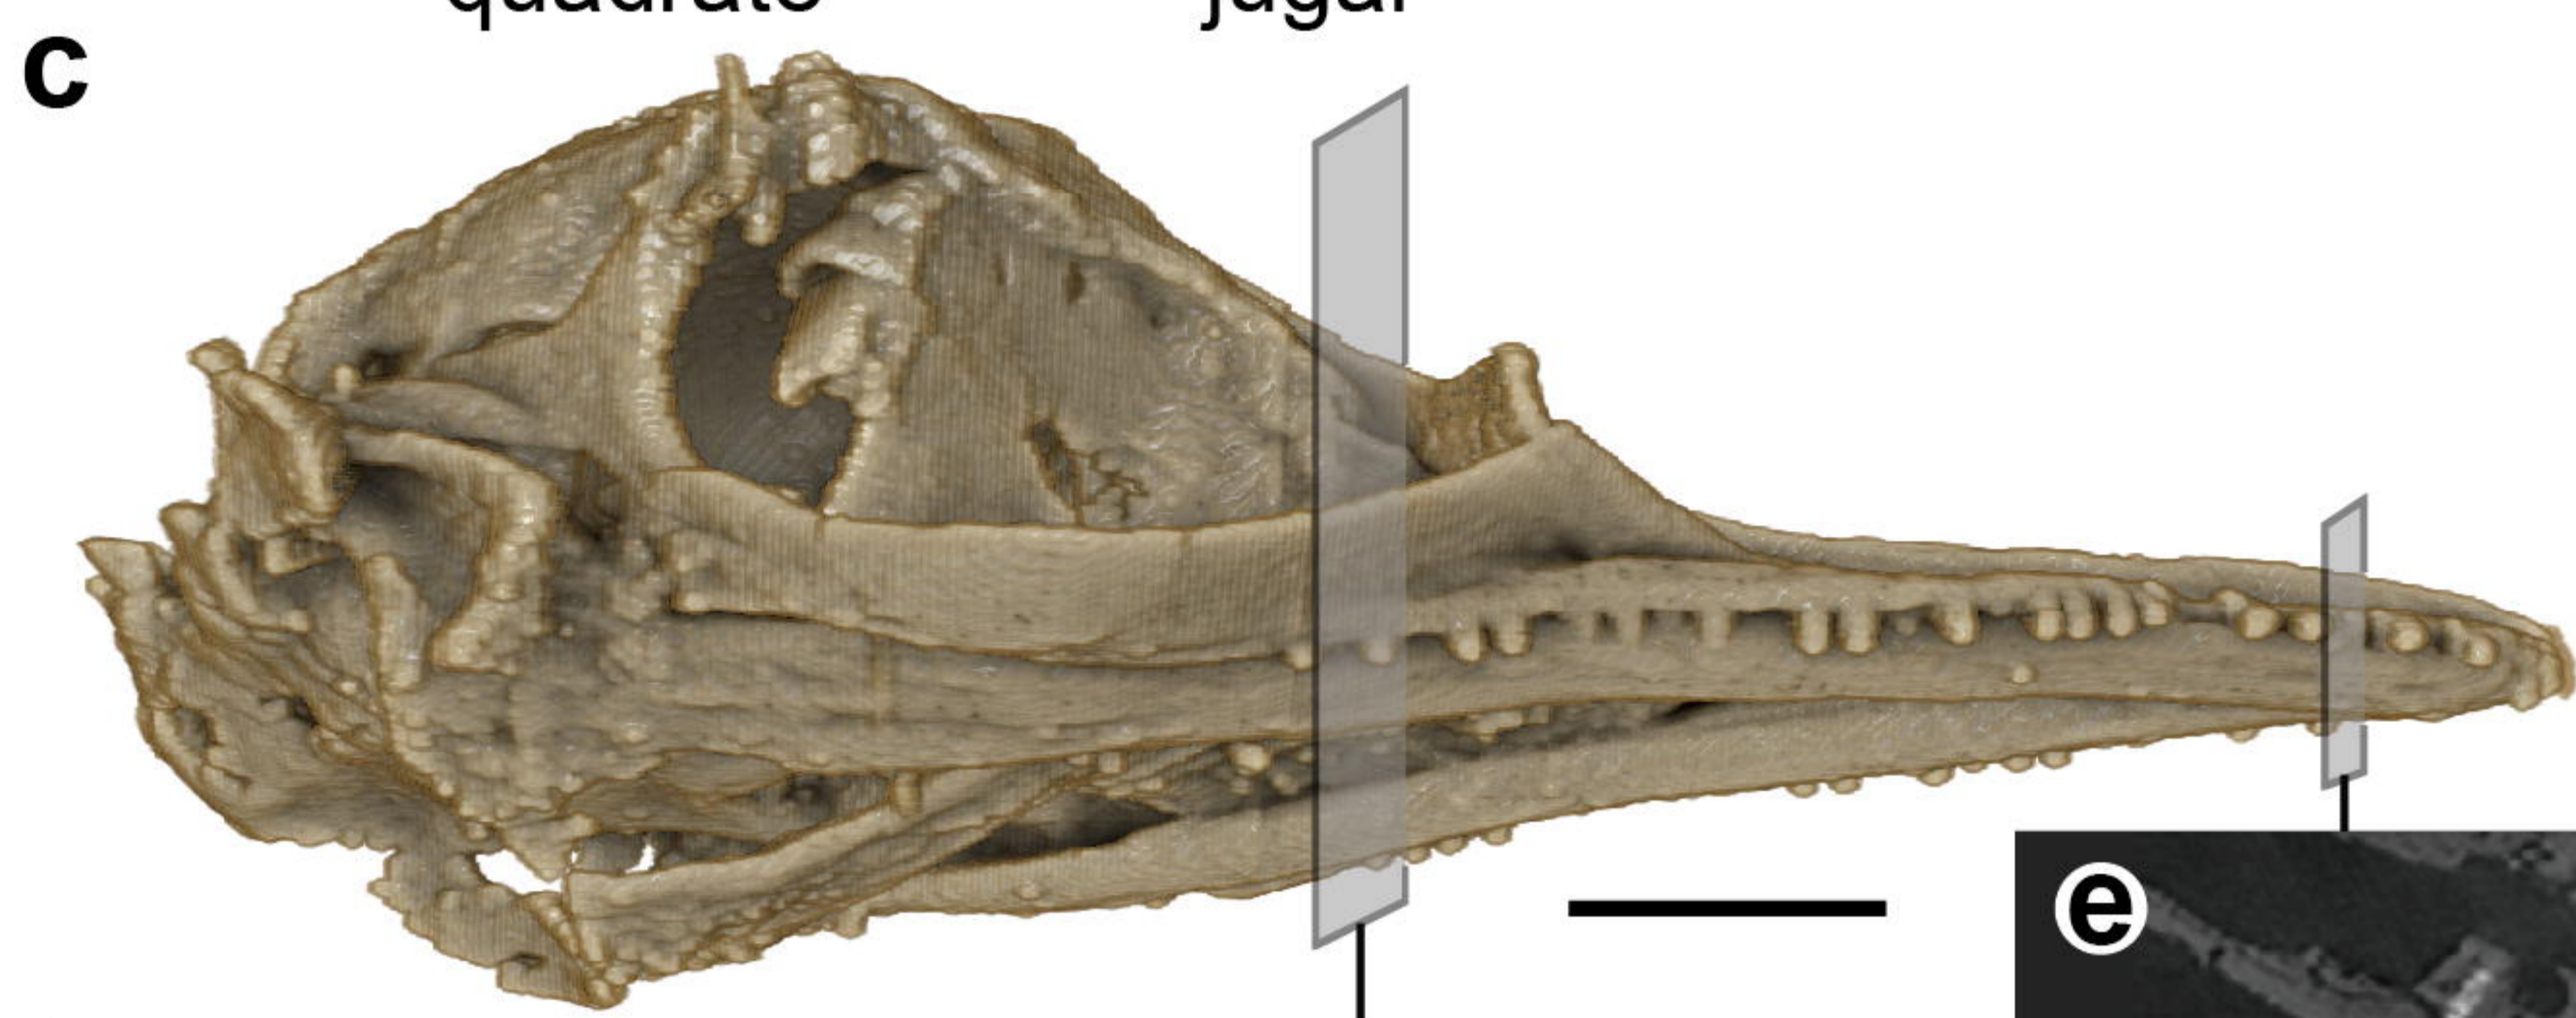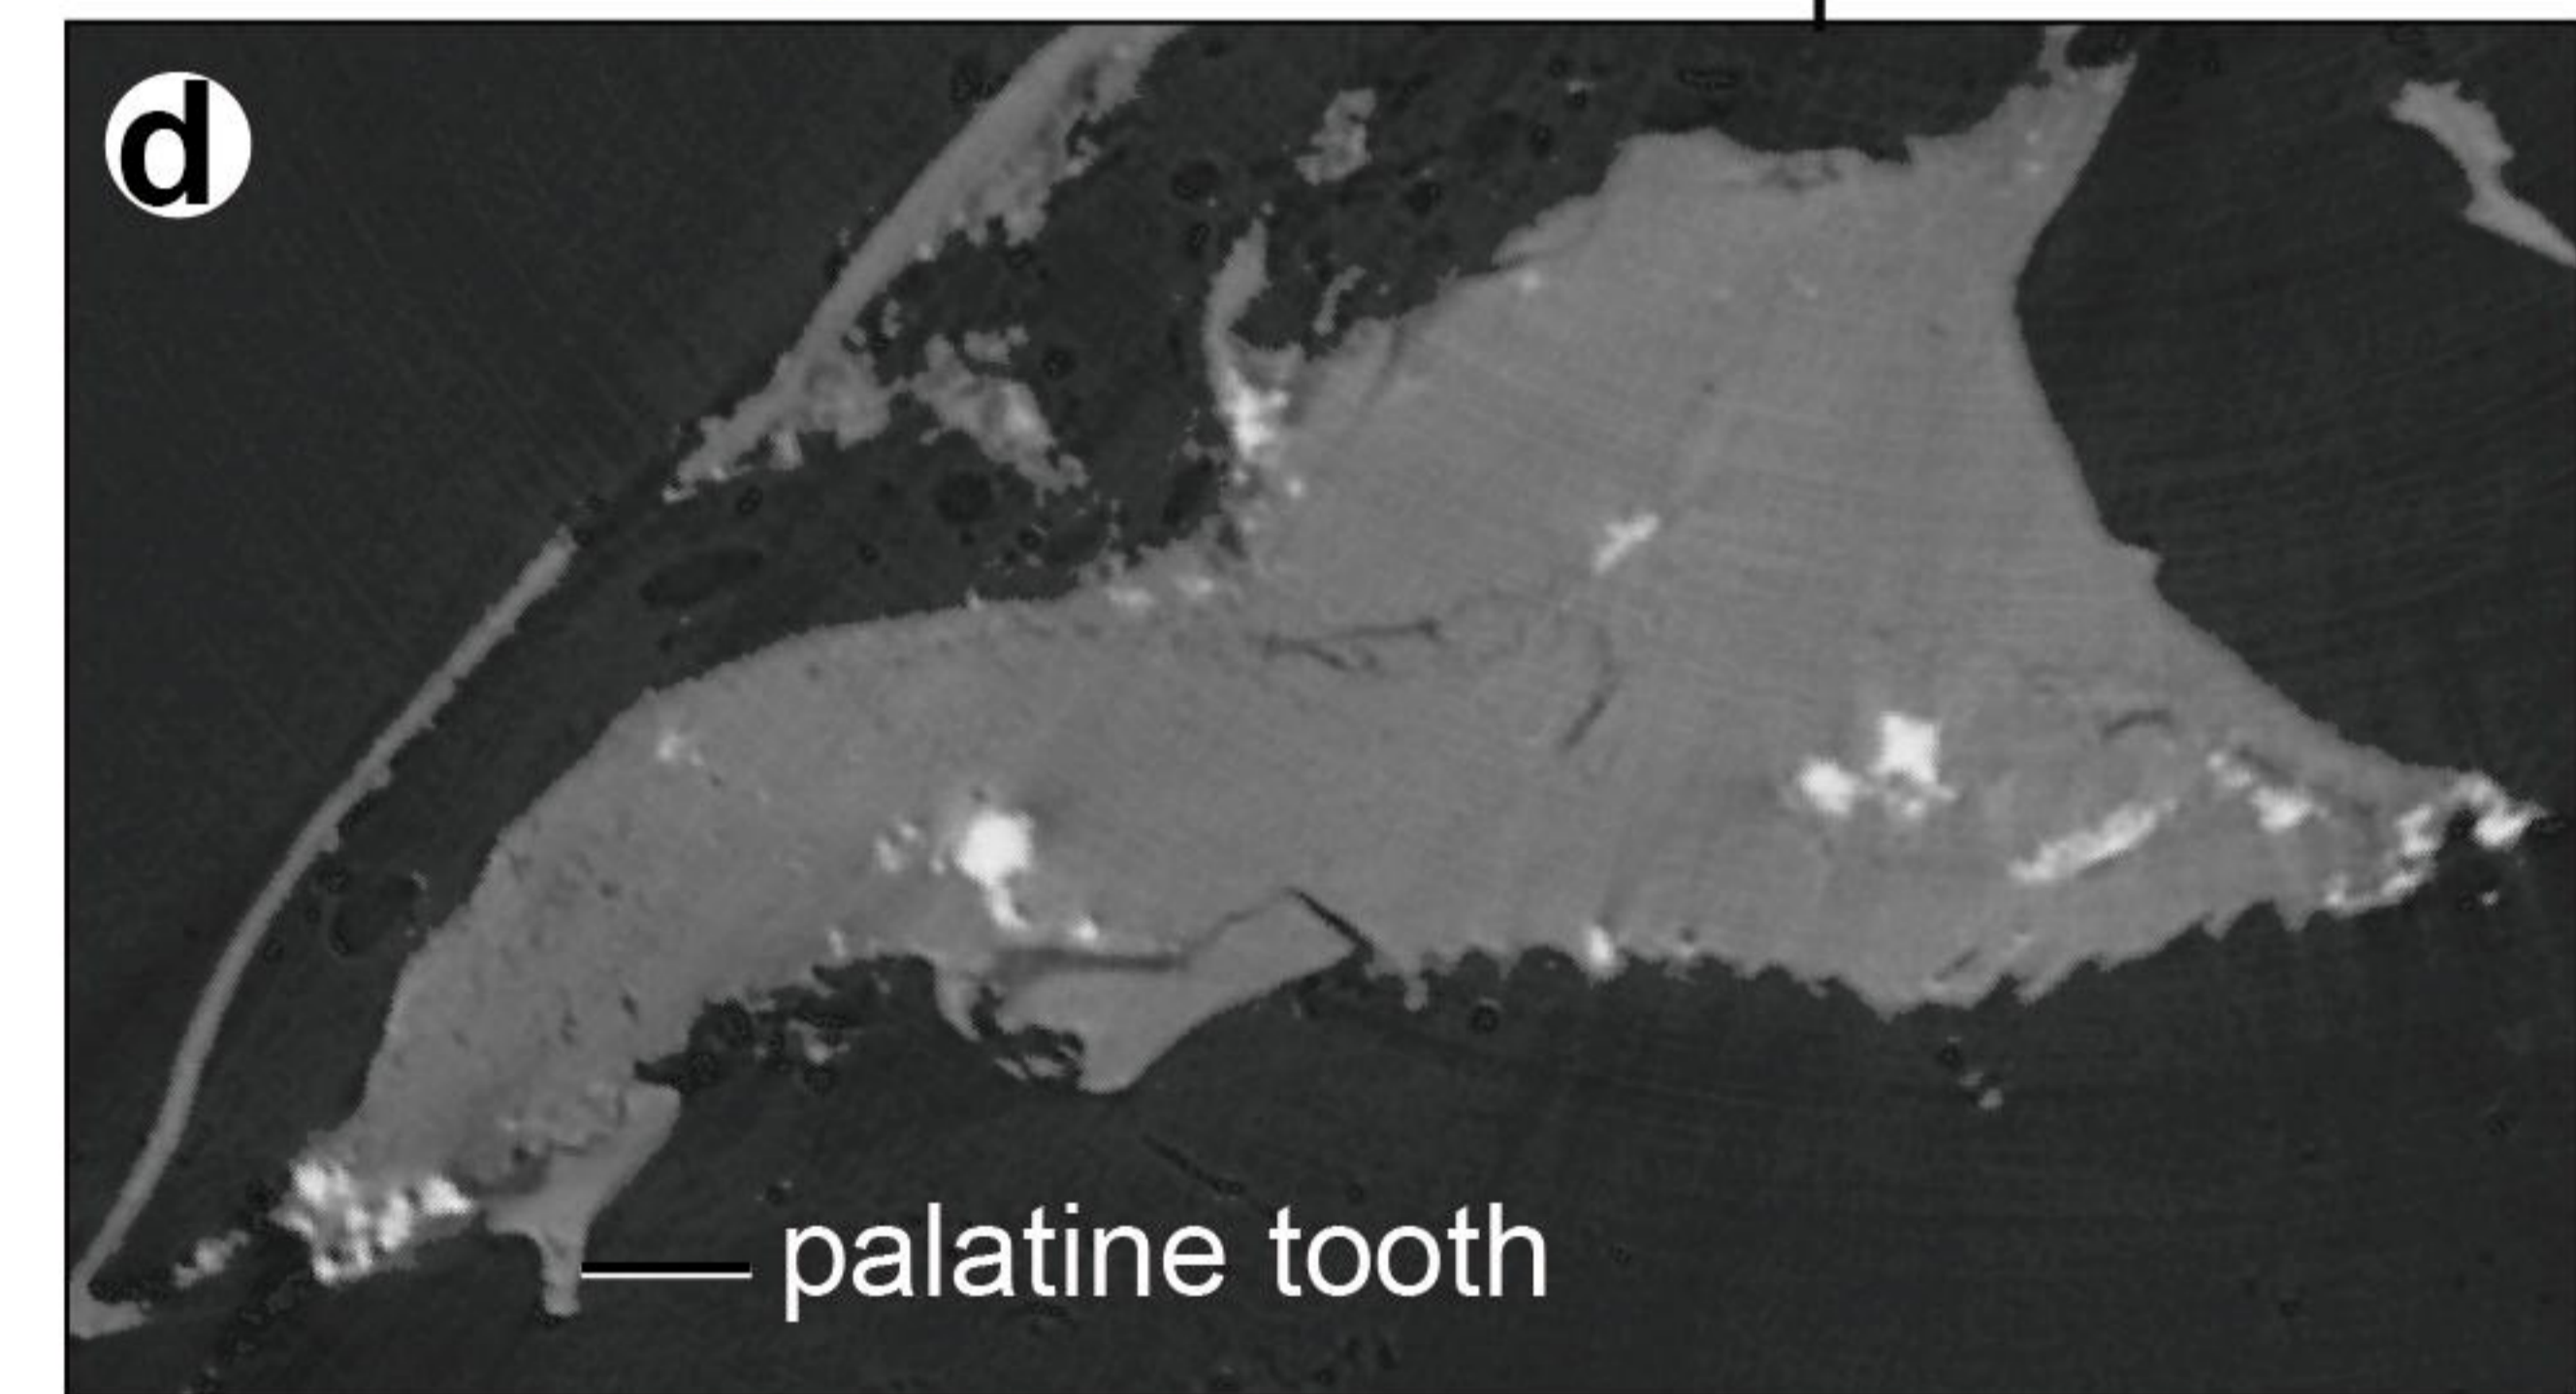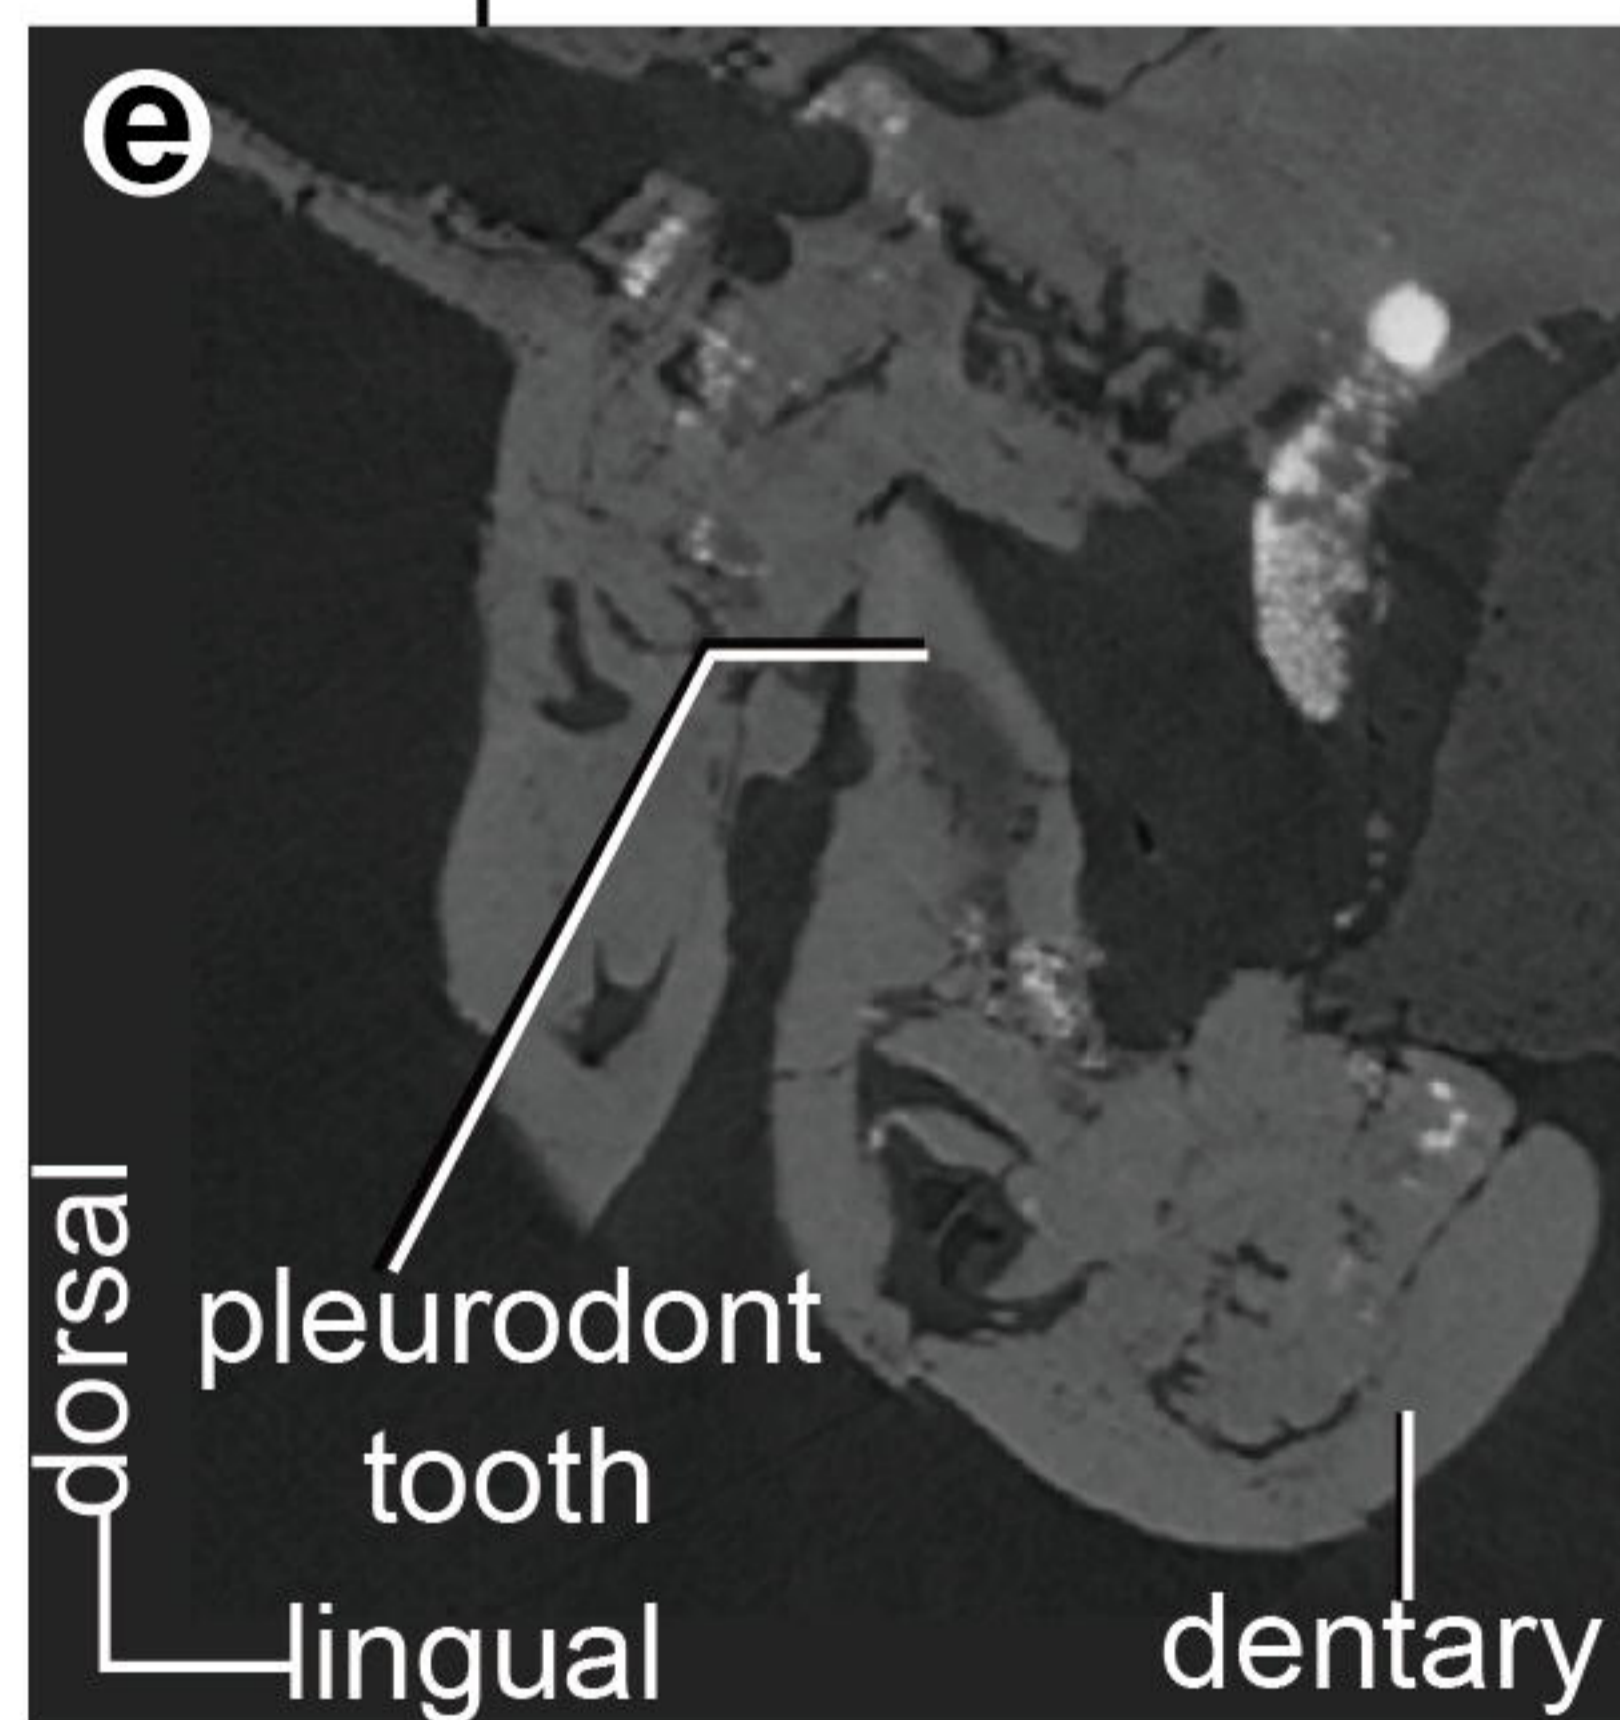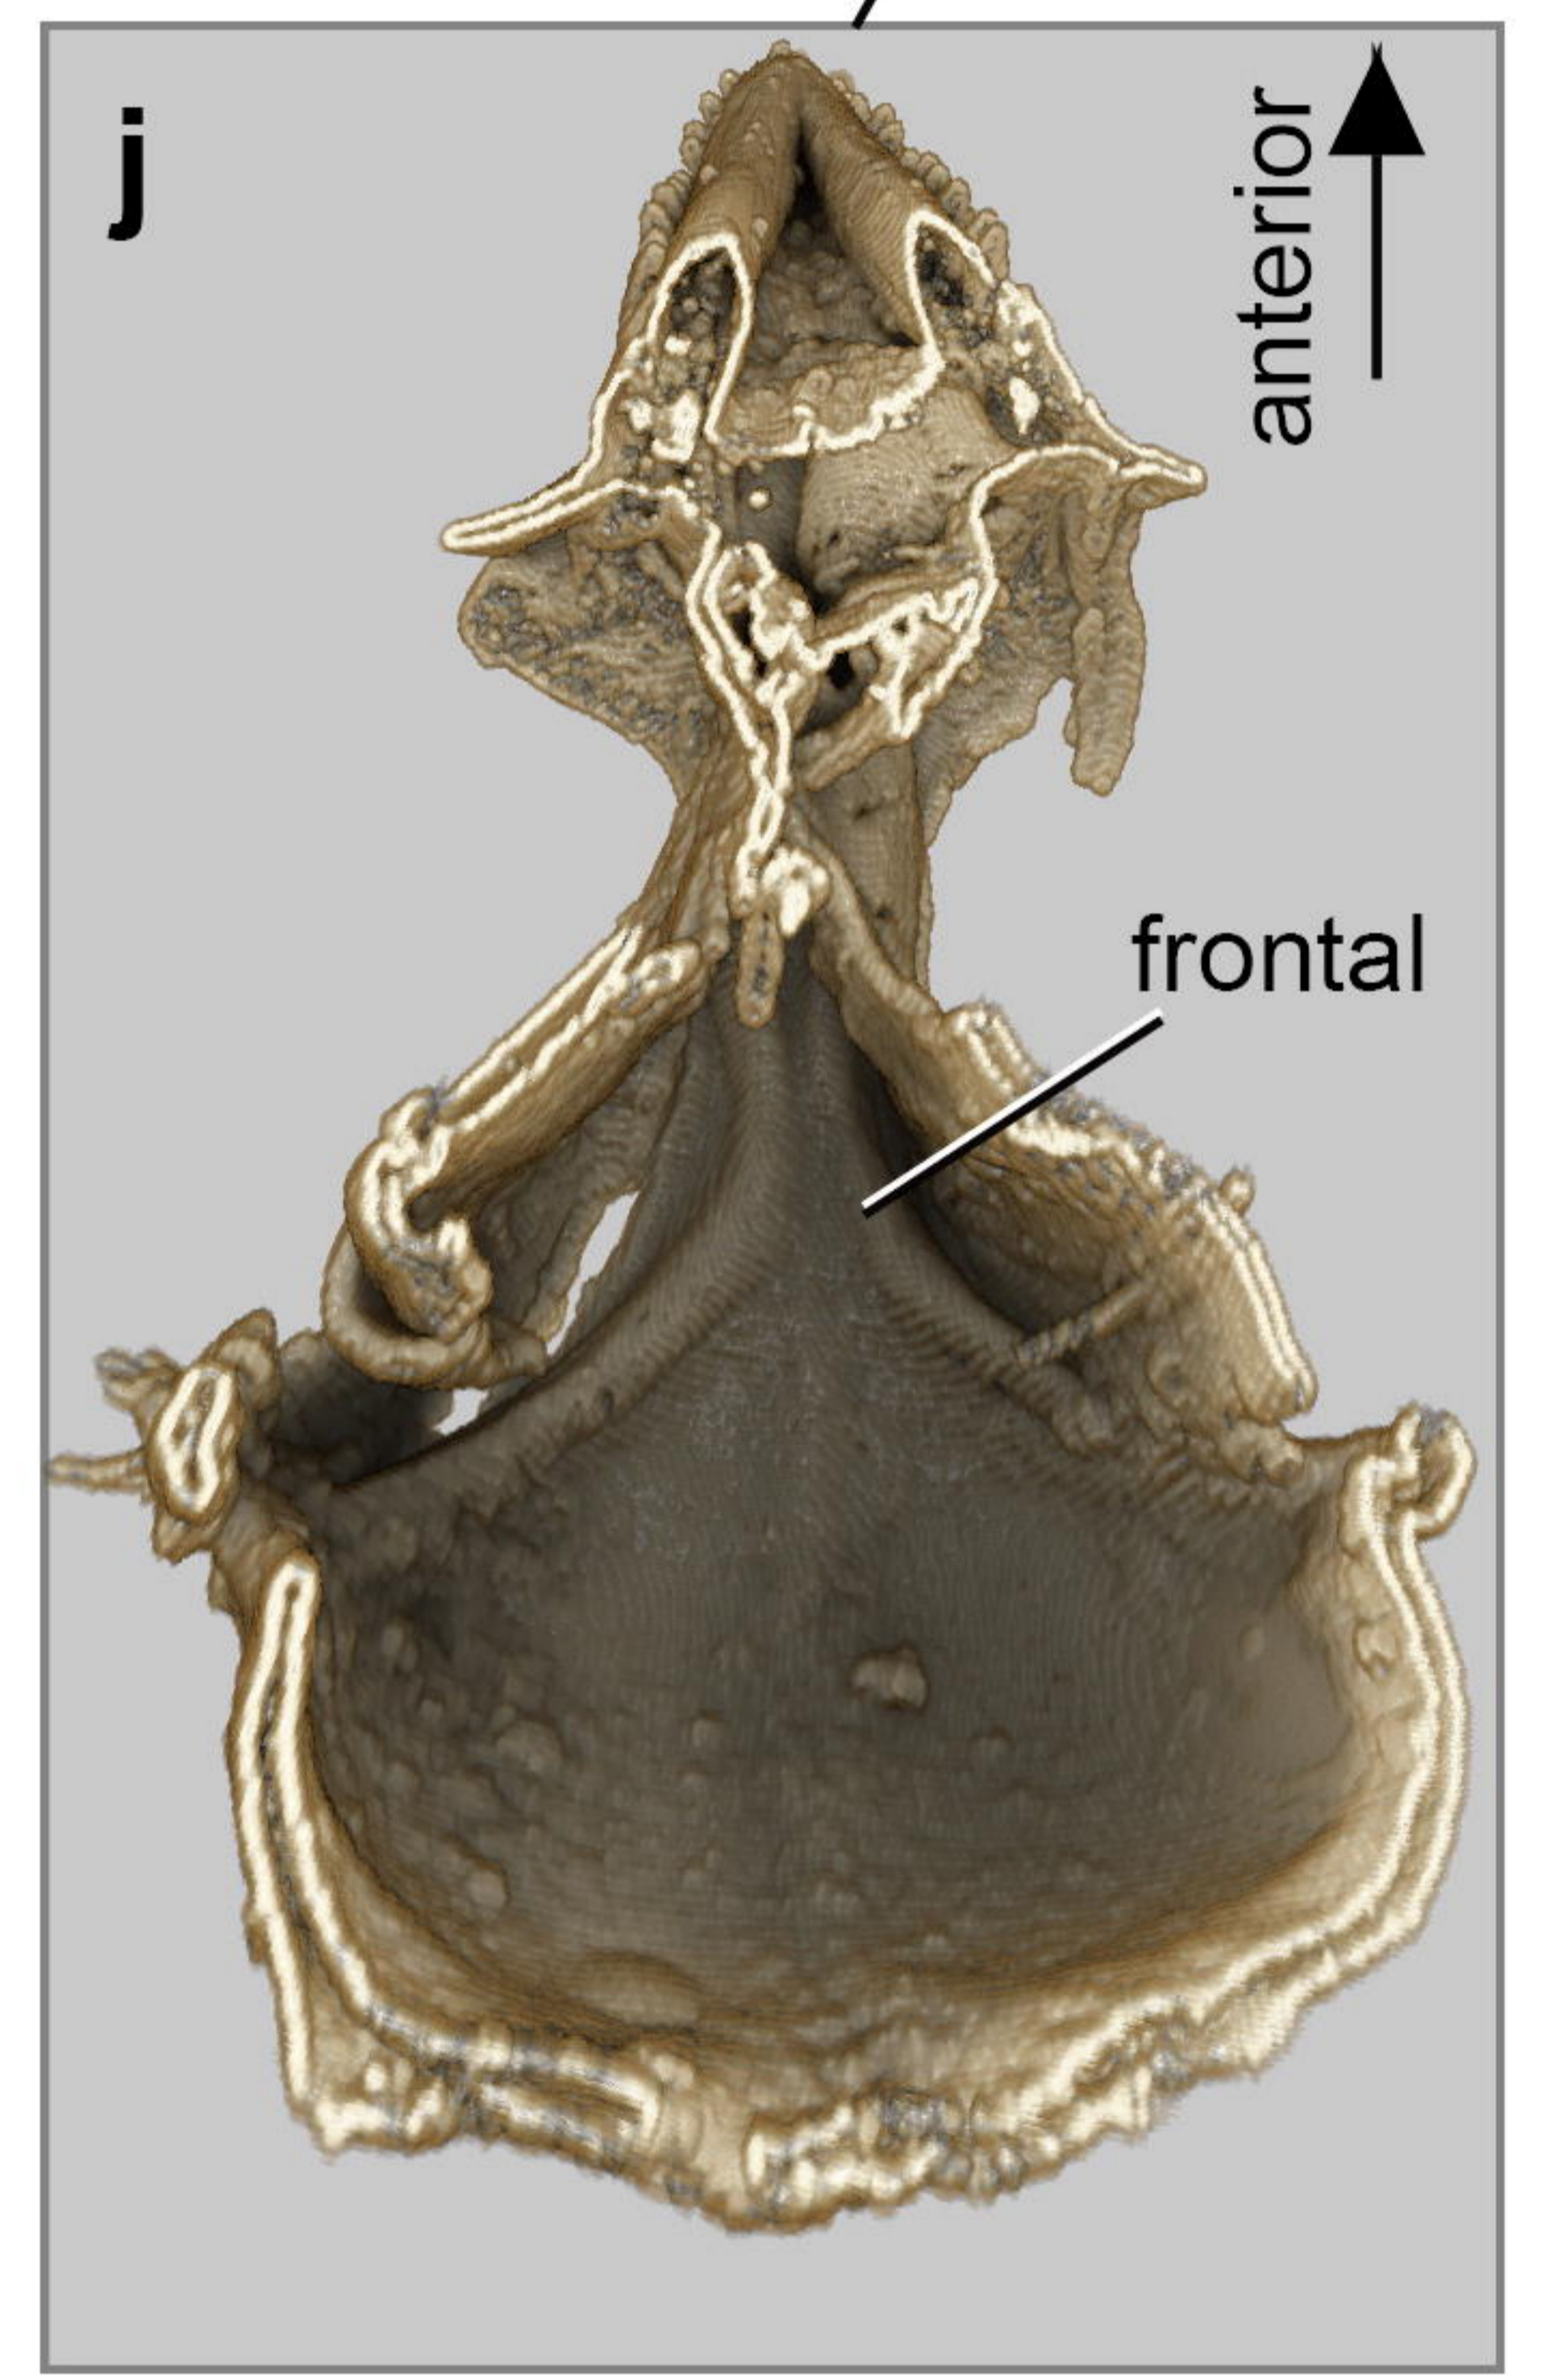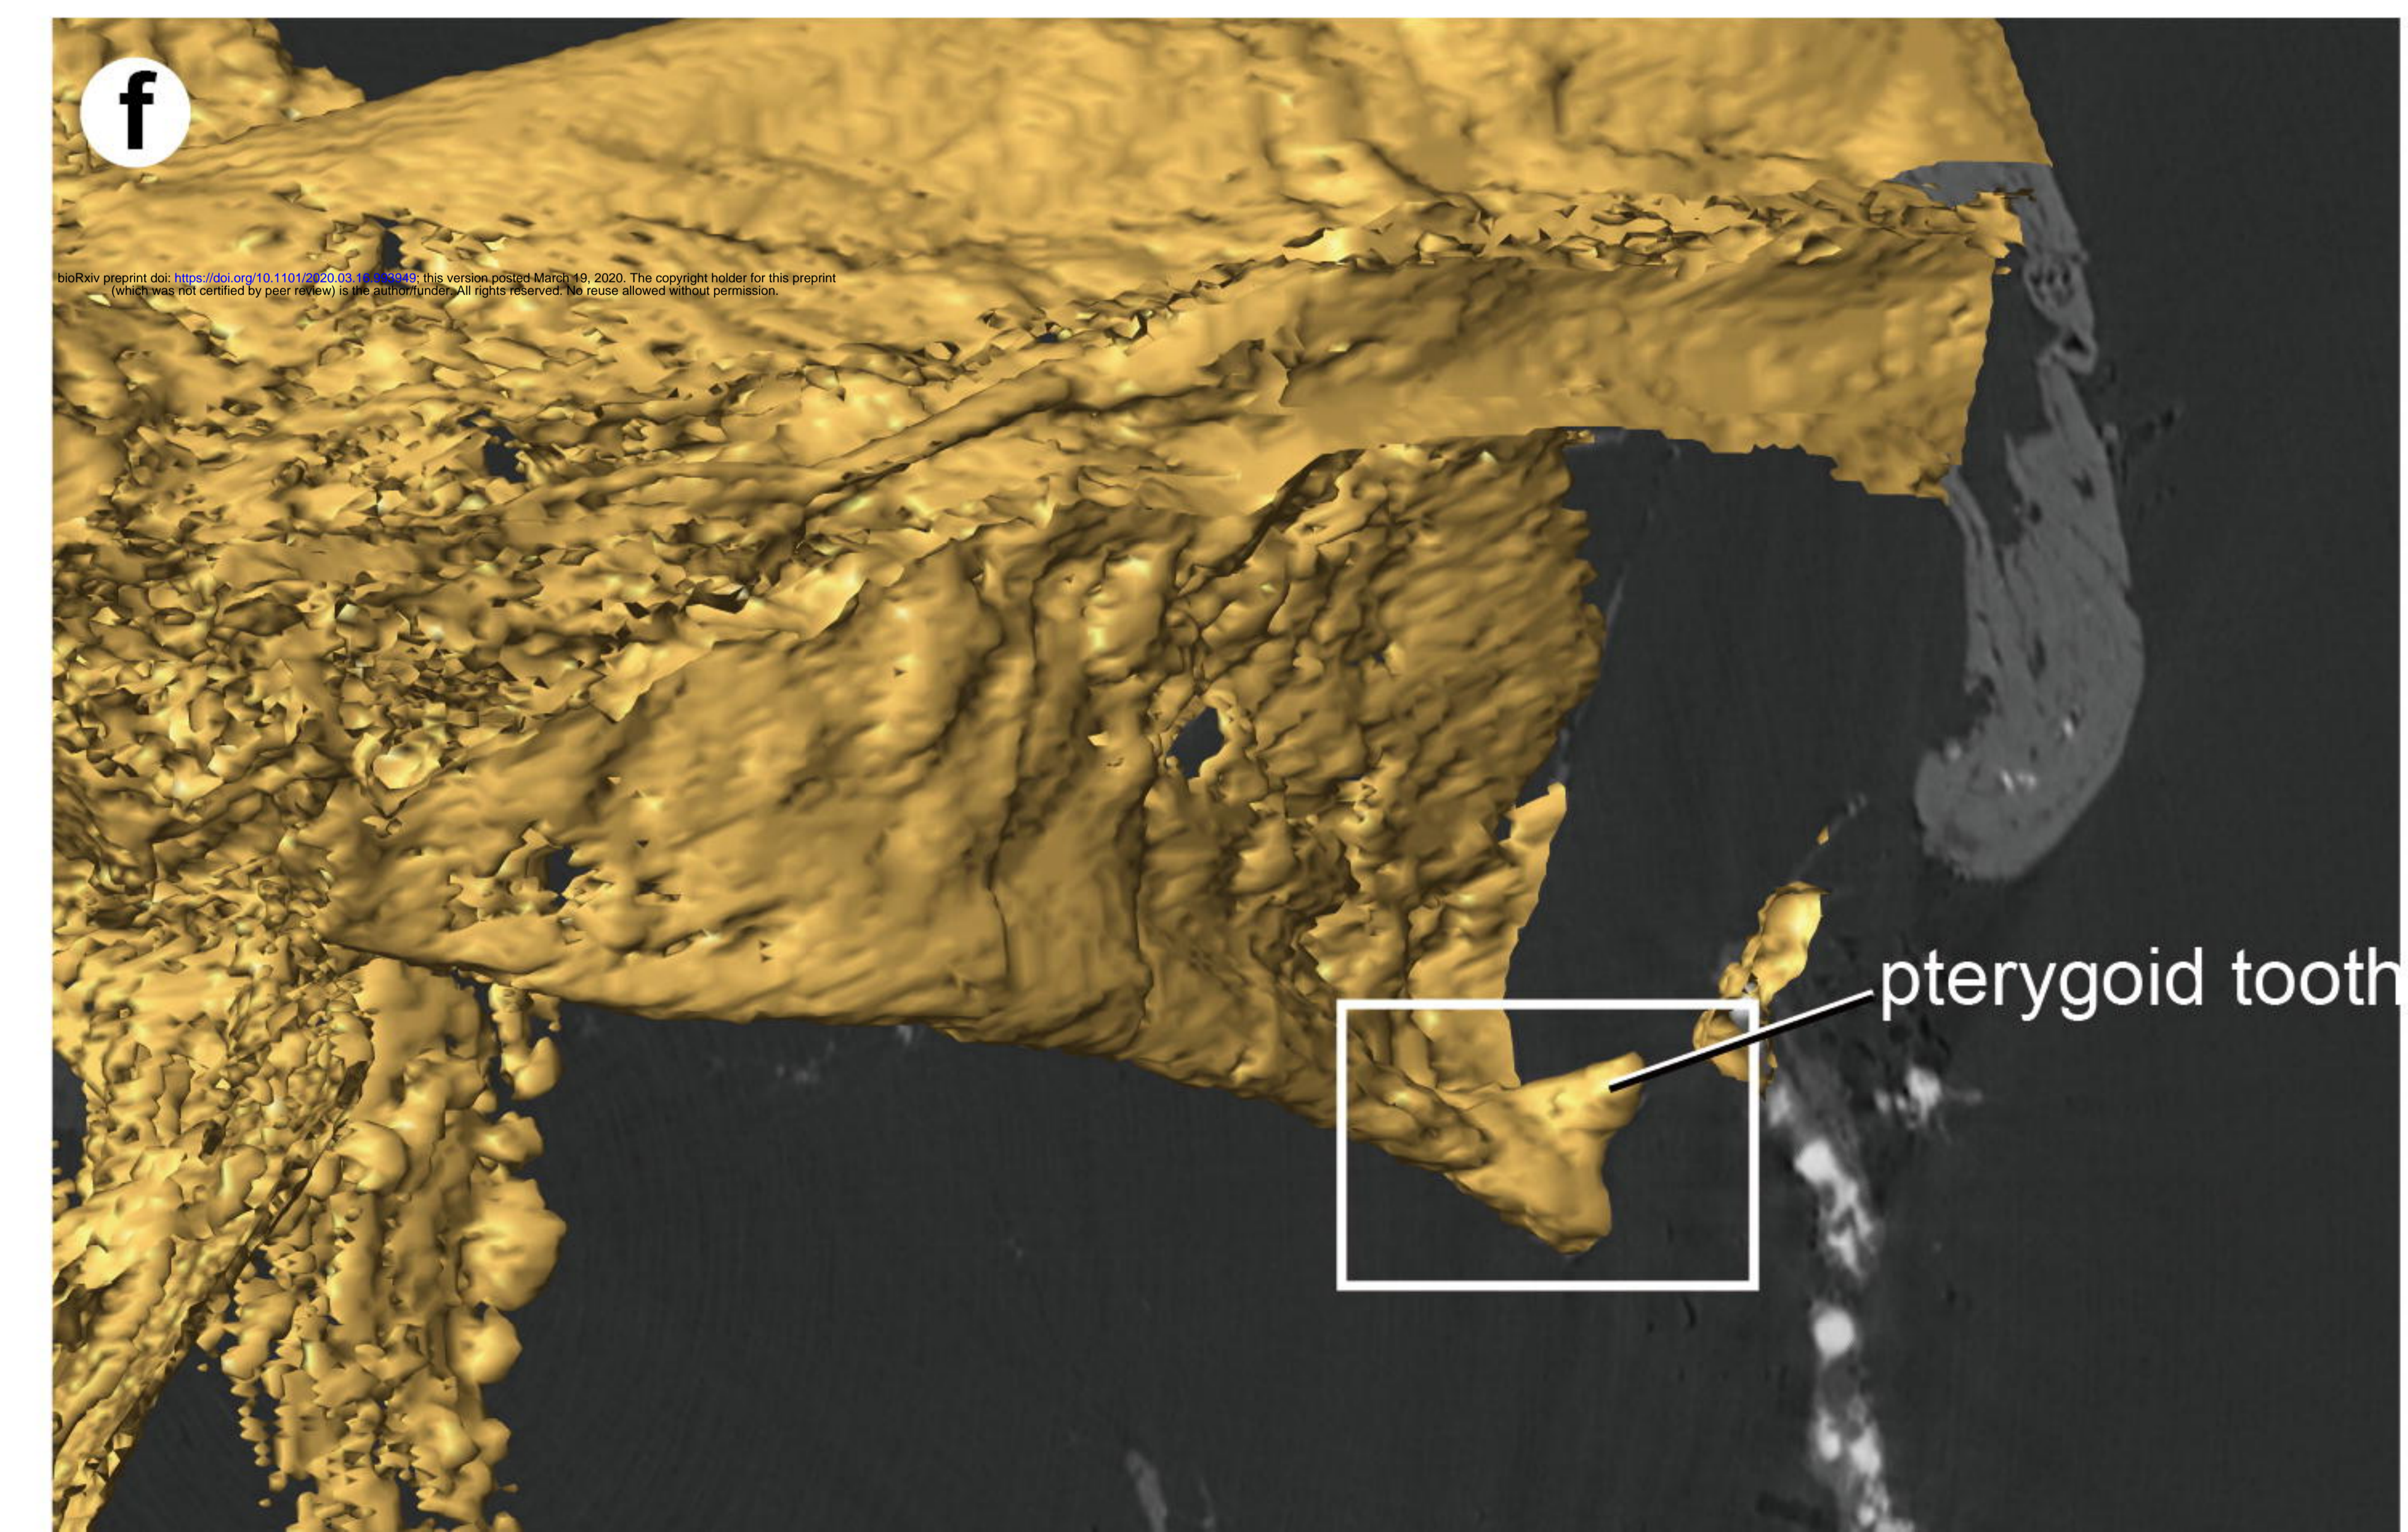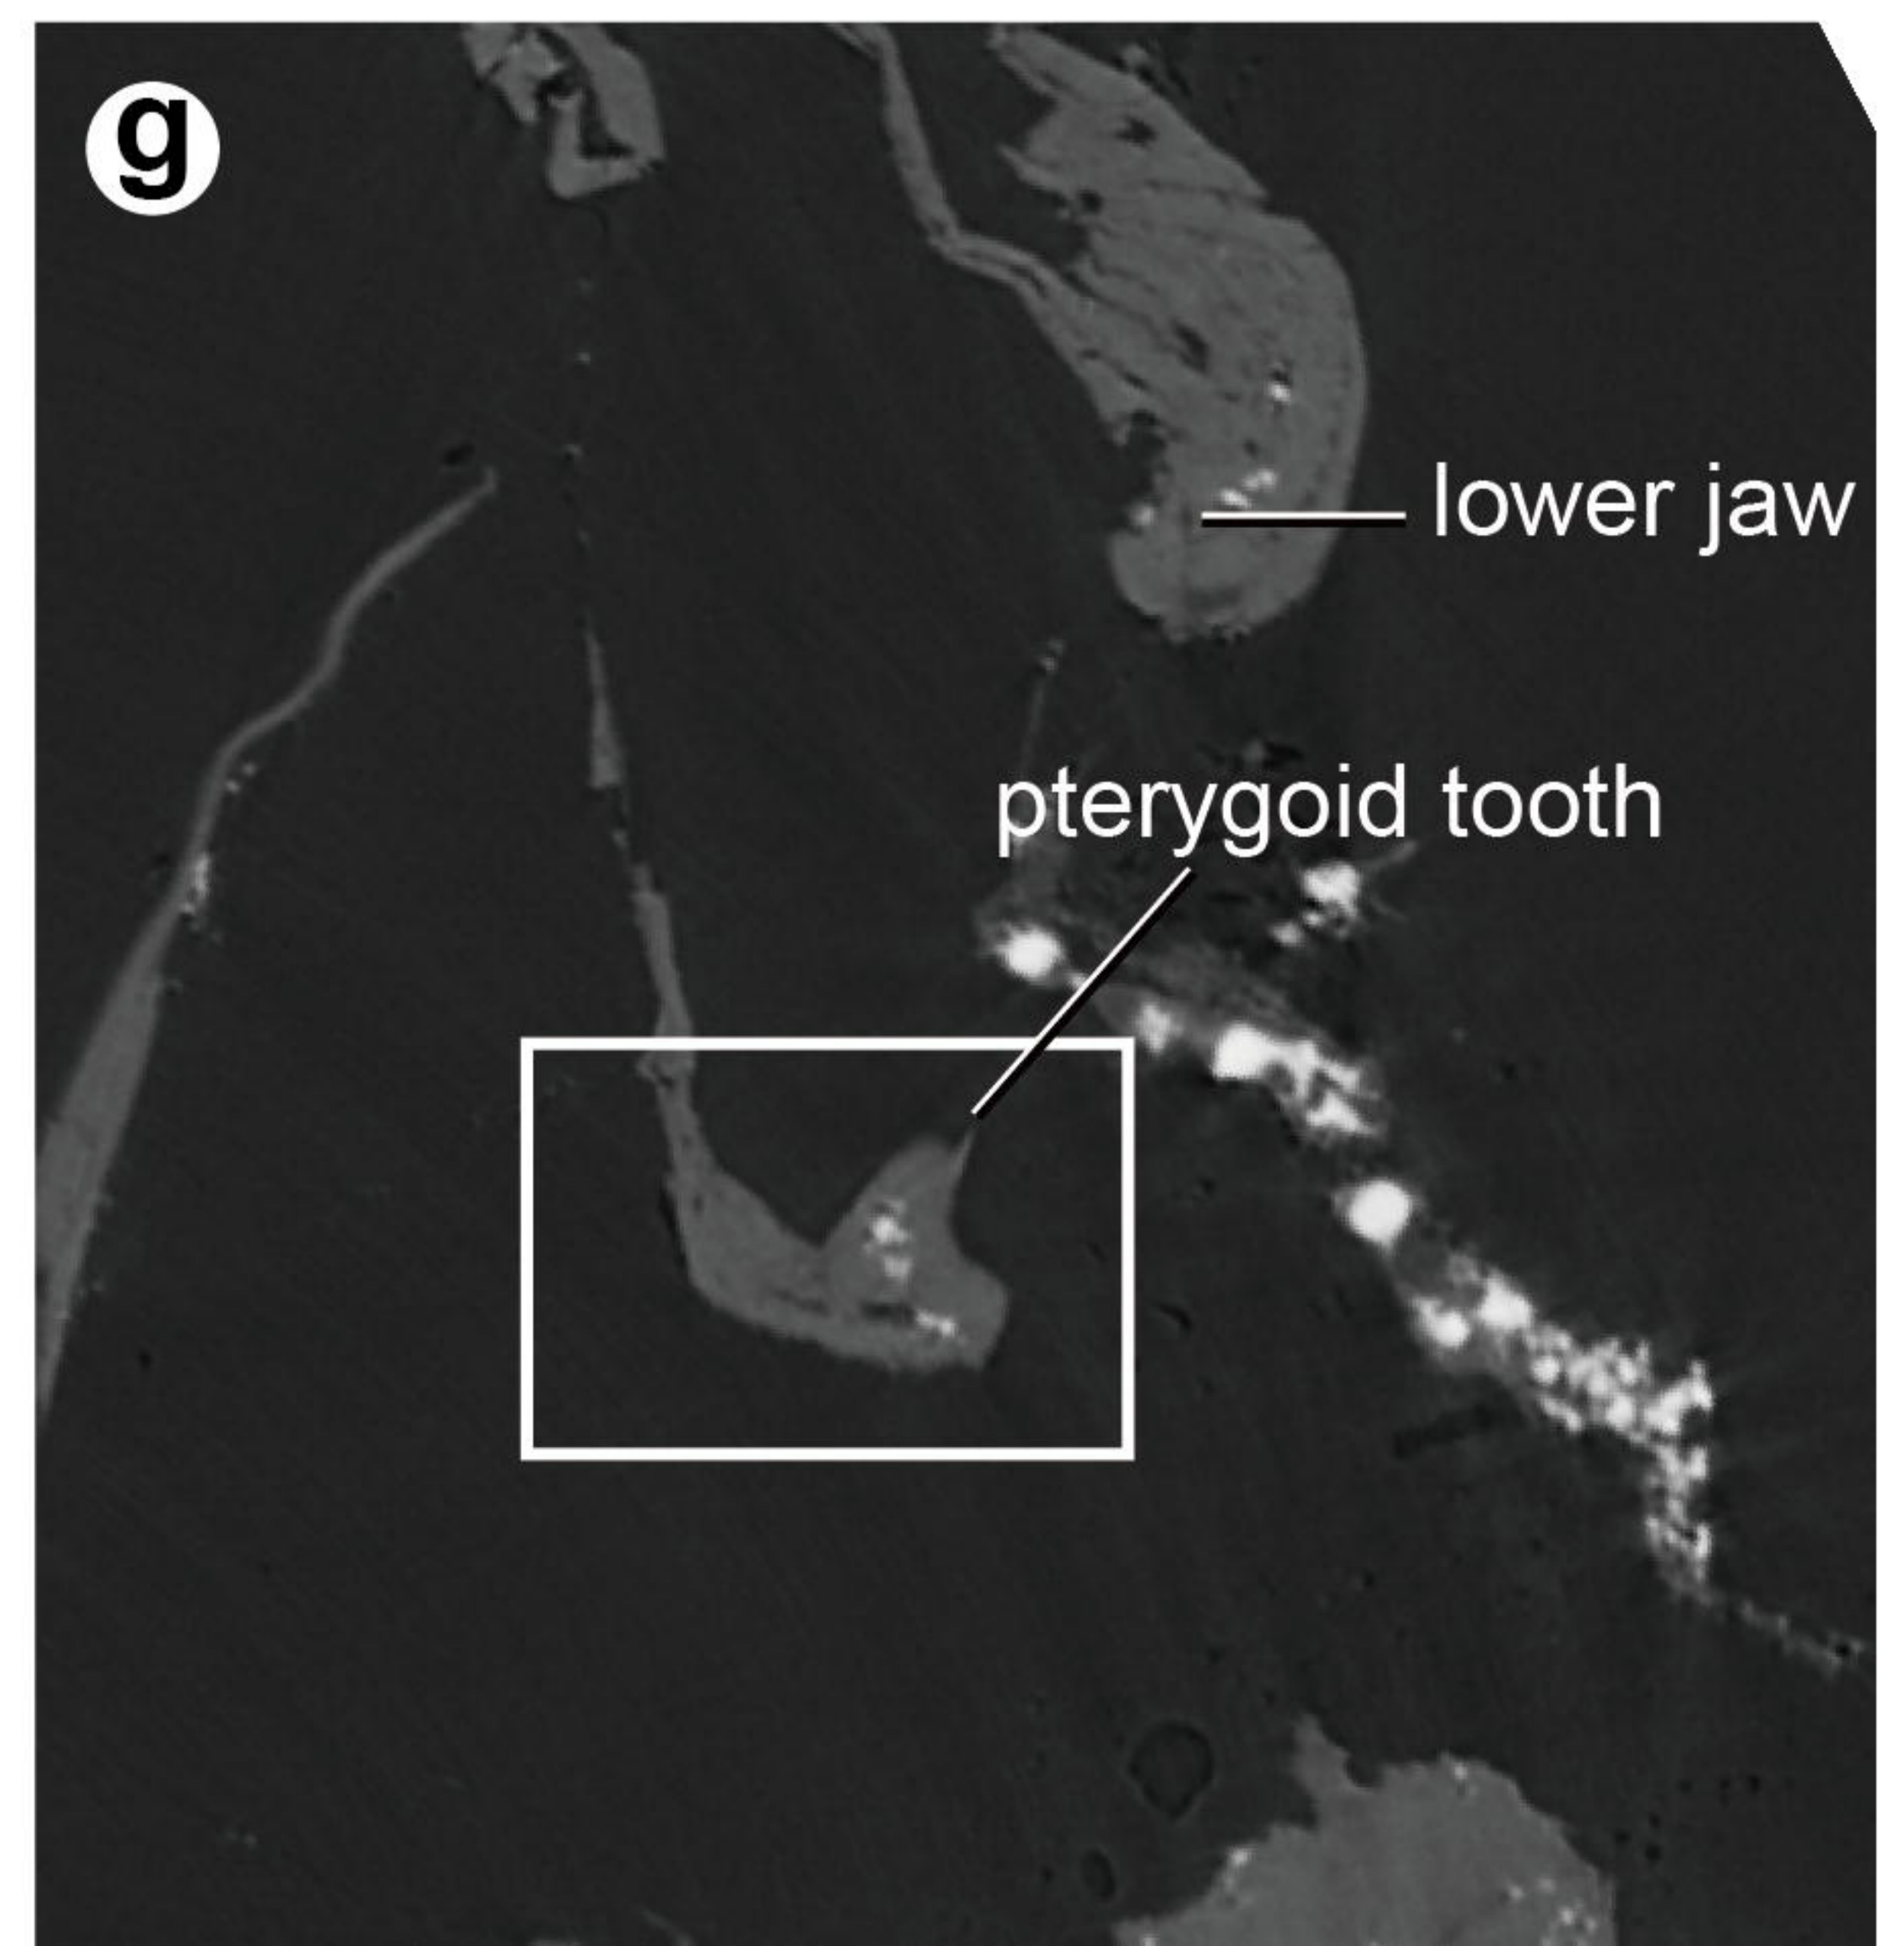



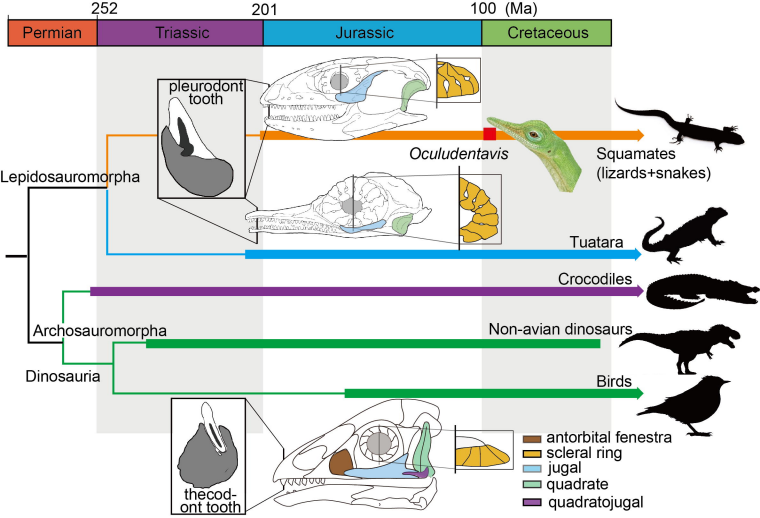

Source: https://www.biorxiv.org/content/10.1101/2020.03.16.993949v2.full.pdf
