1

## Is *Oculudentavis* a bird or even archosaur?

2

3

Zhiheng Li<sup>1</sup>, Wei Wang<sup>2</sup>, Han Hu<sup>3</sup>, Min Wang<sup>1,\*</sup>, Hongyu Yi<sup>1,\*</sup>, Jing Lu<sup>1,\*</sup>

4

5

1 Institute of Vertebrate Paleontology and Paleoanthropology, Chinese Academy of

6

Sciences, Beijing, China.

7

2 Institute of Geology and Geophysics, Chinese Academy of Sciences, Beijing, China.

8

3 University of New England, Armidale, Australia

9

10

Recent finding of a fossil, *Oculudentavis khaungrae* Xing et al. 2020, entombed in a

11

Late Cretaceous amber was claimed to represent a humming bird-sized dinosaur [1].

12

Regardless the intriguing evolutionary hypotheses about the bauplan of Mesozoic

13

dinosaurs (including birds) posited therein, this enigmatic animal, however, demonstrates

14

various lizard-like morphologies, which challenge the fundamental morphological gap

15

between Lepidosauria and Archosauria. Here we reanalyze the original computed

16

tomography scan data of *Oculudentavis*. A suit of squamate synapomorphies, including

17

pleurodont marginal teeth and an open lower temporal fenestra, overwhelmingly support

18

its squamate affinity, and that the avian or dinosaurian assignment of *Oculudentavis* is

19

conclusively rejected.

20

21

### **Introduction**

22

Birds and their close dinosaurian relatives have gained a large spectrum in body size

23

from tens of milliliters to meters. The smallest bird, Bee hummingbird, measures only

24 about 60 mm in length, which is one fifth the size of the smallest known non-avian  
25 theropod. A recent work reported a new “bird”, *Oculudentavis* from a 99 million-year-old  
26 Burmese amber, which was claimed to be the smallest bird ever known and represent a  
27 previously unknown bauplan and novel ecology in Archosaur [1].

28 Here we re-analyze the original computed tomography (CT) scan data and challenge  
29 the primary results — bird or bird-like dinosaur affinity of *Oculudentavis* [1].  
30 Morphological evidences demonstrated here highly contradicted the avian or even  
31 archosaurian phylogenetic placement of *Oculudentavis*, and revealed multiple  
32 synapomorphies of the Squamata for this taxon (Figures 1 and 2).

33

## 34 **Results and discussions**

35 Instead of demonstrating synapomorphies of the Aves, *Oculudentavis* show multiple  
36 “new” characters that has never been found in any previously known birds or non-avian  
37 dinosaurs. One of the most bizarre characters is the absence of an antorbital fenestra.  
38 Xing et al. [1] argued the antorbital fenestra fused with the orbit, but they reported the  
39 lacrimal is present at the anterior margin of the orbit [1]. This contradicts the definition of  
40 the lacrimal in birds, where the lacrimal is the bone between the orbit and antorbital  
41 fenestra [2]. In addition, a separate antorbital fenestra is a stable character among  
42 archosaurs including non-avian dinosaurs and birds [3-5], and all the known Cretaceous  
43 birds do have a separate antorbital fenestra [6-8].

44 Another highly questionable feature in *Oculudentavis* is the maxilla extending  
45 caudally to the level of mid-orbit and forming half of the ventral margin of the orbit,  
46 which is extremely unusual in Aves. In most crown birds, the maxilla terminates anterior

47 to the orbit. The ventral margin of the orbit is formed by the jugal [2, 9]. This is also the  
48 condition among Mesozoic birds, including *Archaeopteryx* [5, 10, 11], *Sapeornis* [12],  
49 enantiornithines [6, 8] and ornithuromorphs [8]. In *Ichthyornis*, maxilla is elongate and  
50 extends further caudally beneath the jugal [13], which means the ventral margin of the  
51 orbit is still mostly composed by the jugal, different from *Oculudentavis*. In addition, we  
52 need to note that the skull of *Jeholornis* was incorrectly reconstructed with a maxilla  
53 extending most of the orbit, and a shortened jugal [1], which certainly lead to a strong  
54 similarity between the skull of *Oculudentavis* and *Jeholornis*. However, the maxilla of  
55 *Jeholornis* is short and most of the ventral margin of the orbit is formed by the elongate  
56 jugal followed by the quadratojugal [8], in stark contrast with *Oculudentavis*.

57 In *Oculudentavis*, the maxillary tooth row extends as far caudally as the rostral half  
58 of the antorbital fenestra. Among most Mesozoic birds, maxillary tooth row ends well  
59 cranially to the cranial margin of the orbit [5, 6, 8]. In contrast, at least four teeth are  
60 located beneath the ventral margin of the orbital, and the last one even ends below the  
61 rostral third point of the orbit in *Oculudentavis*.

62 Although Xing et al. mentioned that the scleral ring and dentition of *Oculudentavis*  
63 resemble lizards [1], they failed to recognize that pleurodont dentition is diagnostic for  
64 squamates [14]. The maxillary and dentary teeth are ankylosed to the jaw with their labial  
65 side (Figure 1E), and replacement teeth develop posterolingual to the functional teeth.  
66 The authors also stated that the tooth implantation appears to be acrodont to pleurodont.  
67 However, there is no evidence for acrodonty based on our reexamination of the original  
68 CT data.

69 In comparison, dinosaurs have thecodont teeth that develop in tooth sockets, with

70 replacement teeth developing beneath the functional teeth. Although the Late Cretaceous  
71 ornithuromorph bird *Hesperornis* retain teeth in a groove (tooth sockets fused together)  
72 [15], it is clearly distinguishable from the pleurodont dentition in *Oculudentavis*. Non-  
73 archosaurian dentition of *Oculudentavis* has also been interpreted as the result of  
74 miniaturization [1]. To our best knowledge, there is no concrete evidence suggesting such  
75 a drastically change of dentition in miniaturized archosaurs. Pleurodont dentition falsifies  
76 the dinosaurian or even archosaurian affinity of *Oculudentavis* — instead it supports the  
77 squamate affinity of this new species.

78 Another unambiguous squamate synapomorphy in *Oculudentavis* is the loss of the  
79 lower temporal bar. In the original publication, a complete orbit was illustrated on the left  
80 side of the skull with an unnamed piece of bone between the jugal and postorbitofrontal  
81 [1]. In addition, the anterior margin of the quadrate articulates with an unlabeled bone.  
82 The misleading illustration suggests that the quadratojugal might be present in  
83 *Oculudentavis*. On the basis of the original CT scan data, we demonstrate that the orbit  
84 on the left side of the skull is crushed. The left jugal is not preserved. The right side of the  
85 skull preserves a complete orbital region, which shows the jugal has a smooth posterior  
86 margin, lacking contact with the quadrate. The quadratojugal is absent (Figure 1A and B),  
87 which means the lower temporal fenestra is open in *Oculudentavis* – a condition shared  
88 with all squamates but not dinosaurs or birds [14, 16, 17].

89 Additional morphologies of *Oculudentavis* that contradict its avian affinity include  
90 the presence of the parietal foramen (Figure 1G), the separate ventral down growths of  
91 frontal (Figure 1H), as well as palatal teeth present on palatine and pterygoid (Figures 1D  
92 and 2)

93

## 94 **Conclusion**

95 *Oculudentavis* means “eye-tooth bird”, yet neither the eyes (scleral ring) nor the teeth  
96 suggest this new species was a bird. Xing et al assigned this enigmatic animal to Aves  
97 based on superficial appearances, such as the exterior contour of the dome-shaped  
98 cranium [1]. Therefore, all the extended discussions, including the morphological  
99 changes related to miniaturization and the ocular morphology, lost their foundation with a  
100 problematic phylogenetic placement of this animal. In addition, multiple unambiguous  
101 characters support the squamate affinity of *Oculudentavis*, including the loss of  
102 quadratojugal, pleurodont marginal teeth, and presence of palatal teeth (Figure 3). The  
103 phylogenetic analysis in Xing et al suffers from biased taxonomic sampling [1]. Our new  
104 morphological discoveries suggest that lepidosaurs should be included in the  
105 phylogenetic analysis of *Oculudentavis*.

106

## 107 **References**

- 108 1. Xing, L., J. K. O'Connor, L. Schmitz, L. M. Chiappe, R. C. McKellar, Q. Yi, and  
109 G. Li. (2020). Hummingbird-sized dinosaur from the Cretaceous period of  
110 Myanmar. *Nature* 579, 245–249.
- 111 2. Baumel, J.J., and L. M. Witmer. (1993). Osteologia; pp. 45–132 in J. J. Baumel, A.  
112 S. King, J. E. Breazile, H. E. Evans, and V. B. J. C. (eds.), *Handbook of Avian  
113 anatomy: Nomina Anatomica Avium*, second edition. Nuttall Ornithological Club,  
114 Cambridge, U.K.
- 115 3. Rauhut, O.W. (2003). The interrelationships and evolution of basal theropod

- 116 dinosaurs. Special Papers In Palaeontology Series 69, 1–213.
- 117 4. David, B.W., D. Peter, and H. Osmólska (2004). The Dinosauria. University of  
118 California Press.
- 119 5. Rauhut, O.W., C. Foth, and H. Tischlinger (2018). The oldest *Archaeopteryx*  
120 (Theropoda: Avialiae): a new specimen from the Kimmeridgian/Tithonian  
121 boundary of Schamhaupten, Bavaria. PeerJ 6:e4191.
- 122 6. O'Connor, J., and L. M. Chiappe (2011). A revision of enantiornithine (Aves:  
123 Ornithothoraces) skull morphology. Journal of Systematic Palaeontology 9, 135–  
124 157.
- 125 7. Xu, X., H. You, K. Du, and F. Han. (2011). An *Archaeopteryx*-like theropod from  
126 China and the origin of Avialae. Nature 475, 465–470.
- 127 8. Wang, M., and H. Hu (2017). A Comparative Morphological Study of the Jugal  
128 and Quadratojugal in Early Birds and Their Dinosaurian Relatives. The  
129 Anatomical Record 300, 62–75.
- 130 9. Livezey, B.C., and R. L. Zusi (2006). Higher-order phylogeny of modern birds  
131 (Theropoda, Aves: Neornithes) based on comparative anatomy: I. methods and  
132 characters. Bulletin of Carnegie Museum of Natural History 37, 1–544.
- 133 10. Elzanowski, A., and P. Wellnhofer (1996). Cranial morphology of *Archaeopteryx*:  
134 evidence from the seventh skeleton. Journal of Vertebrate Paleontology 16, 81–94.
- 135 11. Mayr, G., B. Pohl, and D. S. Peters (2005). A well-preserved *Archaeopteryx*  
136 specimen with theropod features. Science 310, 1483–1486.
- 137 12. Zhou, Z., and F. Zhang. (2003). Anatomy of the primitive bird *Sapeornis*  
138 *chaoyangensis* from the Early Cretaceous of Liaoning, China. Canadian Journal

- 139 of Earth Sciences 40:731–747.
- 140 13. Field, D.J., M. Hanson, D. Burnham, L. E. Wilson, K. Super, D. Ehret, J. A.  
141 Ebersole, and B.-A. S. Bhullar. (2018). Complete *Ichthyornis* skull illuminates  
142 mosaic assembly of the avian head. *Nature* 557, 96–100.
- 143 14. Estes, R., Kevin de Queiroz, and Jacques Gauthier (1988). Phylogenetic  
144 relationships within Squamata. *Phylogenetic relationships of the lizard families*,  
145 119–281.
- 146 15. Dumont, M., P. Tafforeau, T. Bertin, B.-A. Bhullar, D. Field, A. Schulp, B.  
147 Strilisky, B. Thivichon-Prince, L. Viriot, and A. Louchart. (2016). Synchrotron  
148 imaging of dentition provides insights into the biology of *Hesperornis* and  
149 *Ichthyornis*, the “last” toothed birds. *BMC Evolutionary Biology* 16, 1–28.
- 150 16. Conrad, J.L. (2008). Phylogeny And Systematics Of Squamata (Reptilia) Based  
151 On Morphology. *Bulletin of the American Museum of Natural History* 310, 1–182.
- 152 17. Gauthier, J.A., Kearney, M., Maisano, J.A., Rieppel, O., and Behlke, A.D.B.  
153 (2012). Assembling the Squamate Tree of Life: Perspectives from the Phenotype  
154 and the Fossil Record. *Bulletin of the Peabody Museum of Natural History* 53, 3–  
155 308.
- 156 18. Čerňanský, A., and Syromyatnikova, E. (2019). The first Miocene fossils of  
157 *Lacerta* cf. *trilineata* (Squamata, Lacertidae) with a comparative study of the main  
158 cranial osteological differences in green lizards and their relatives. *PLoS ONE* 14.
- 159 19. Wang, Y., Hu, H., O'Connor, J., Wang, M., Xu, X., Zhou, Z., Wang, X., and Zheng,  
160 X. (2017). A previously undescribed specimen reveals new information on the  
161 dentition of Cretaceous bird *Sapeornis chaoyangensis*. *Cretaceous Research* 74,

162 1–10.

163

164 **Figure legends**

165 **Figure 1.** Re-analysis of cranial anatomy of *Oculudentavis khaungraae* Xing et al. 2020

166 (holotype, HPG-15-3) based on original computed tomography scan data [1]. A-C, Scale

167 bar, 2 mm; D-H, Not to scale.

168 (A) Right lateral view.

169 (B) Line drawing of right lateral view, showing the absence of quadratojugal in

170 *Oculudentavis*, and the arrangement of the orbital bones has been reinterpreted.

171 (C) Anterolateral view. (D) Tomographs through palatine, showing palatine teeth

172 (E) Tomographs through dentary, showing the typical pleurodont tooth

173 (F) Dorsal view

174 (G) Tomographs through pineal foramen

175 (H) The top half part of the skull has been removed, showing the narrowed frontals

176

177 **Figure 2.** Simplified reptile family tree, illustrative drawings showing the comparison of

178 the skull in *Oculudentavis*, squamates (green lizard *Lacerta bilineata*, modified from [18])

179 and birds (Cretaceous bird *Sapeornis*, modified from [19]).

180

181 **Figure 3.** Detailed anatomical characters supporting squamate affinity of *Oculudentavis*

182 revealed by CT.

183 (A) Pterygoid tooth shown in three-dimensional reconstruction of the skull

184 (B) Pterygoid tooth shown in coronal section of the skull



185

186

### 187 **Methods and Data availability**

188           The original CT scan data was obtained upon request from the authors of original  
189 paper [1]. Two 3D format files (9.5G in total) were combined into one and re-rendered in  
190 Drishti 2.6.5 (<https://github.com/nci/drishti/releases>). Scan data were analyzed in Avizo  
191 ([www.thermofisher.com](http://www.thermofisher.com)) and imaged in Adobe photoshop ([www.adobe.com](http://www.adobe.com)). For more  
192 scanning, 3D reconstruction and data information see [1].

193

### 194 **Acknowledgement**

195           We thank G.L., J.K.O. and L.X. for providing the original CT scan data for re-  
196 analyzing. We thank colleagues at Institute of Vertebrate Paleontology and  
197 Paleoanthropology, Chinese Academy of Sciences for their great help during preparing  
198 and writing the manuscript.

199

### 200 **Author Contributions**

201           All authors designed the project, analyzed and discussed the data, and wrote the  
202 manuscript. All authors contributed equally.

203

### 204 **Conflict of Interests**

205           No

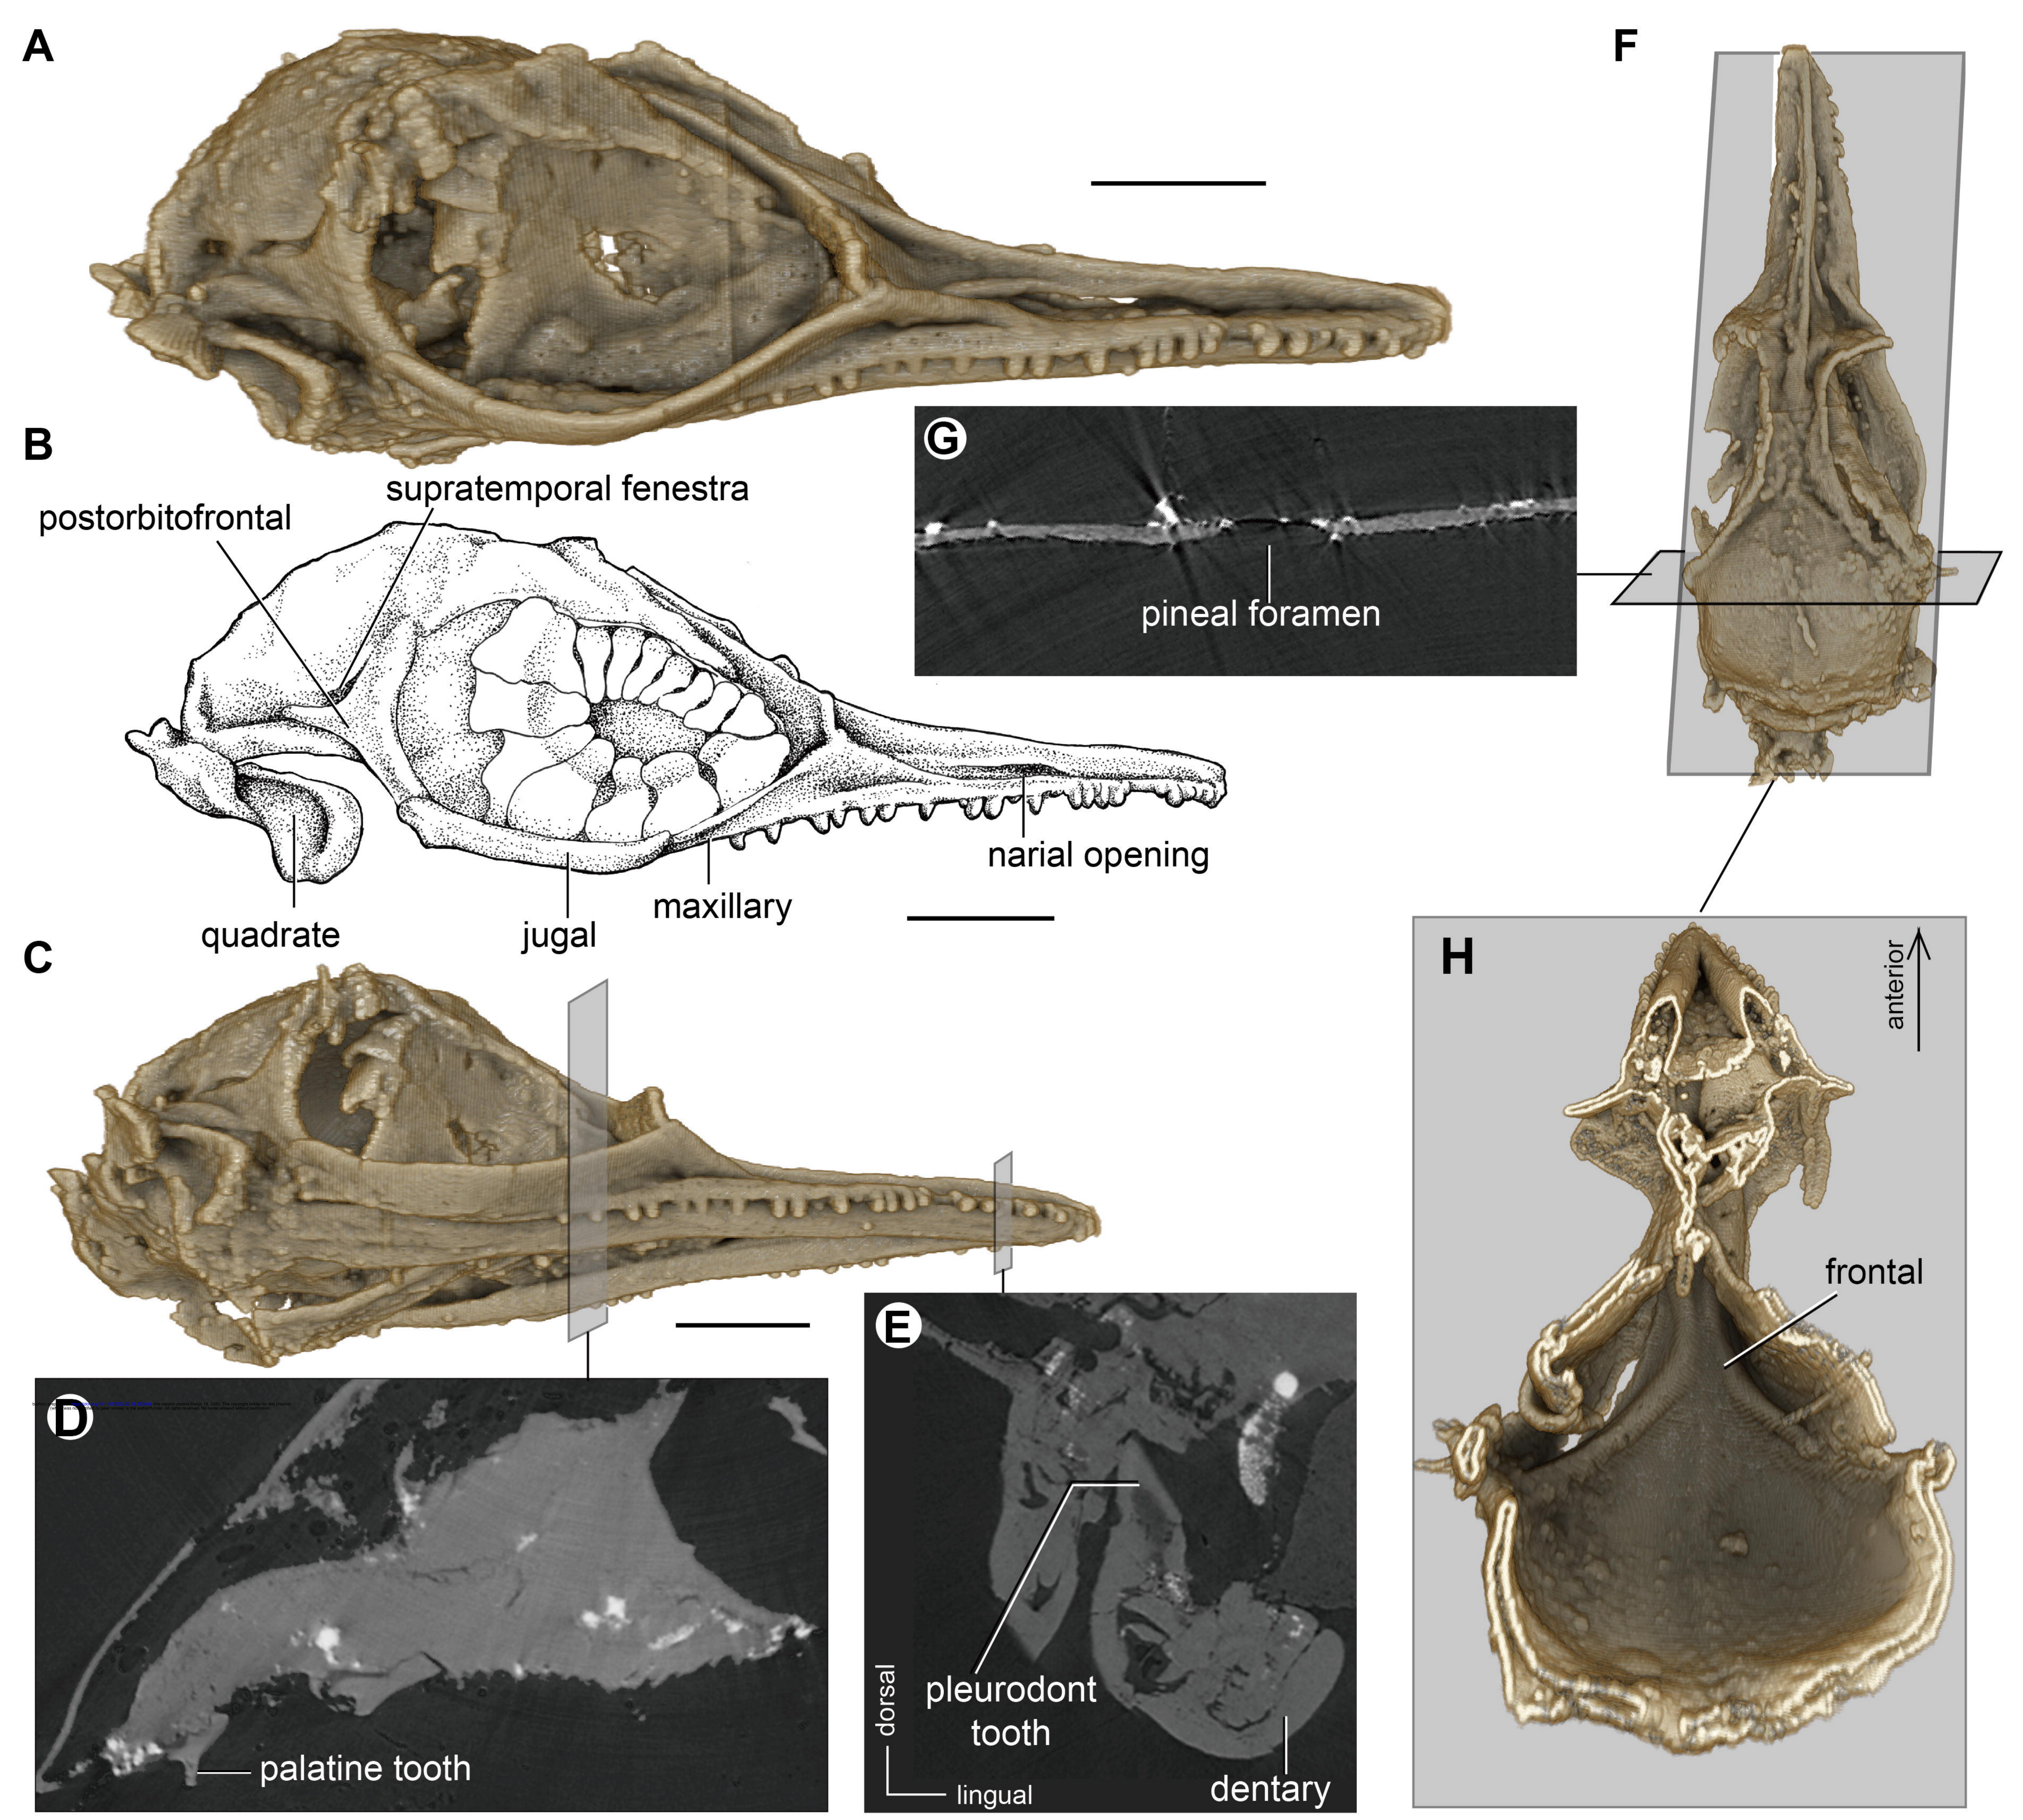

**A**

bioRxiv preprint doi: <https://doi.org/10.1101/2020.03.16.993949>; this version posted March 18, 2020. The copyright holder for this preprint (which was not certified by peer review) is the author/funder. All rights reserved. No reuse allowed without permission.

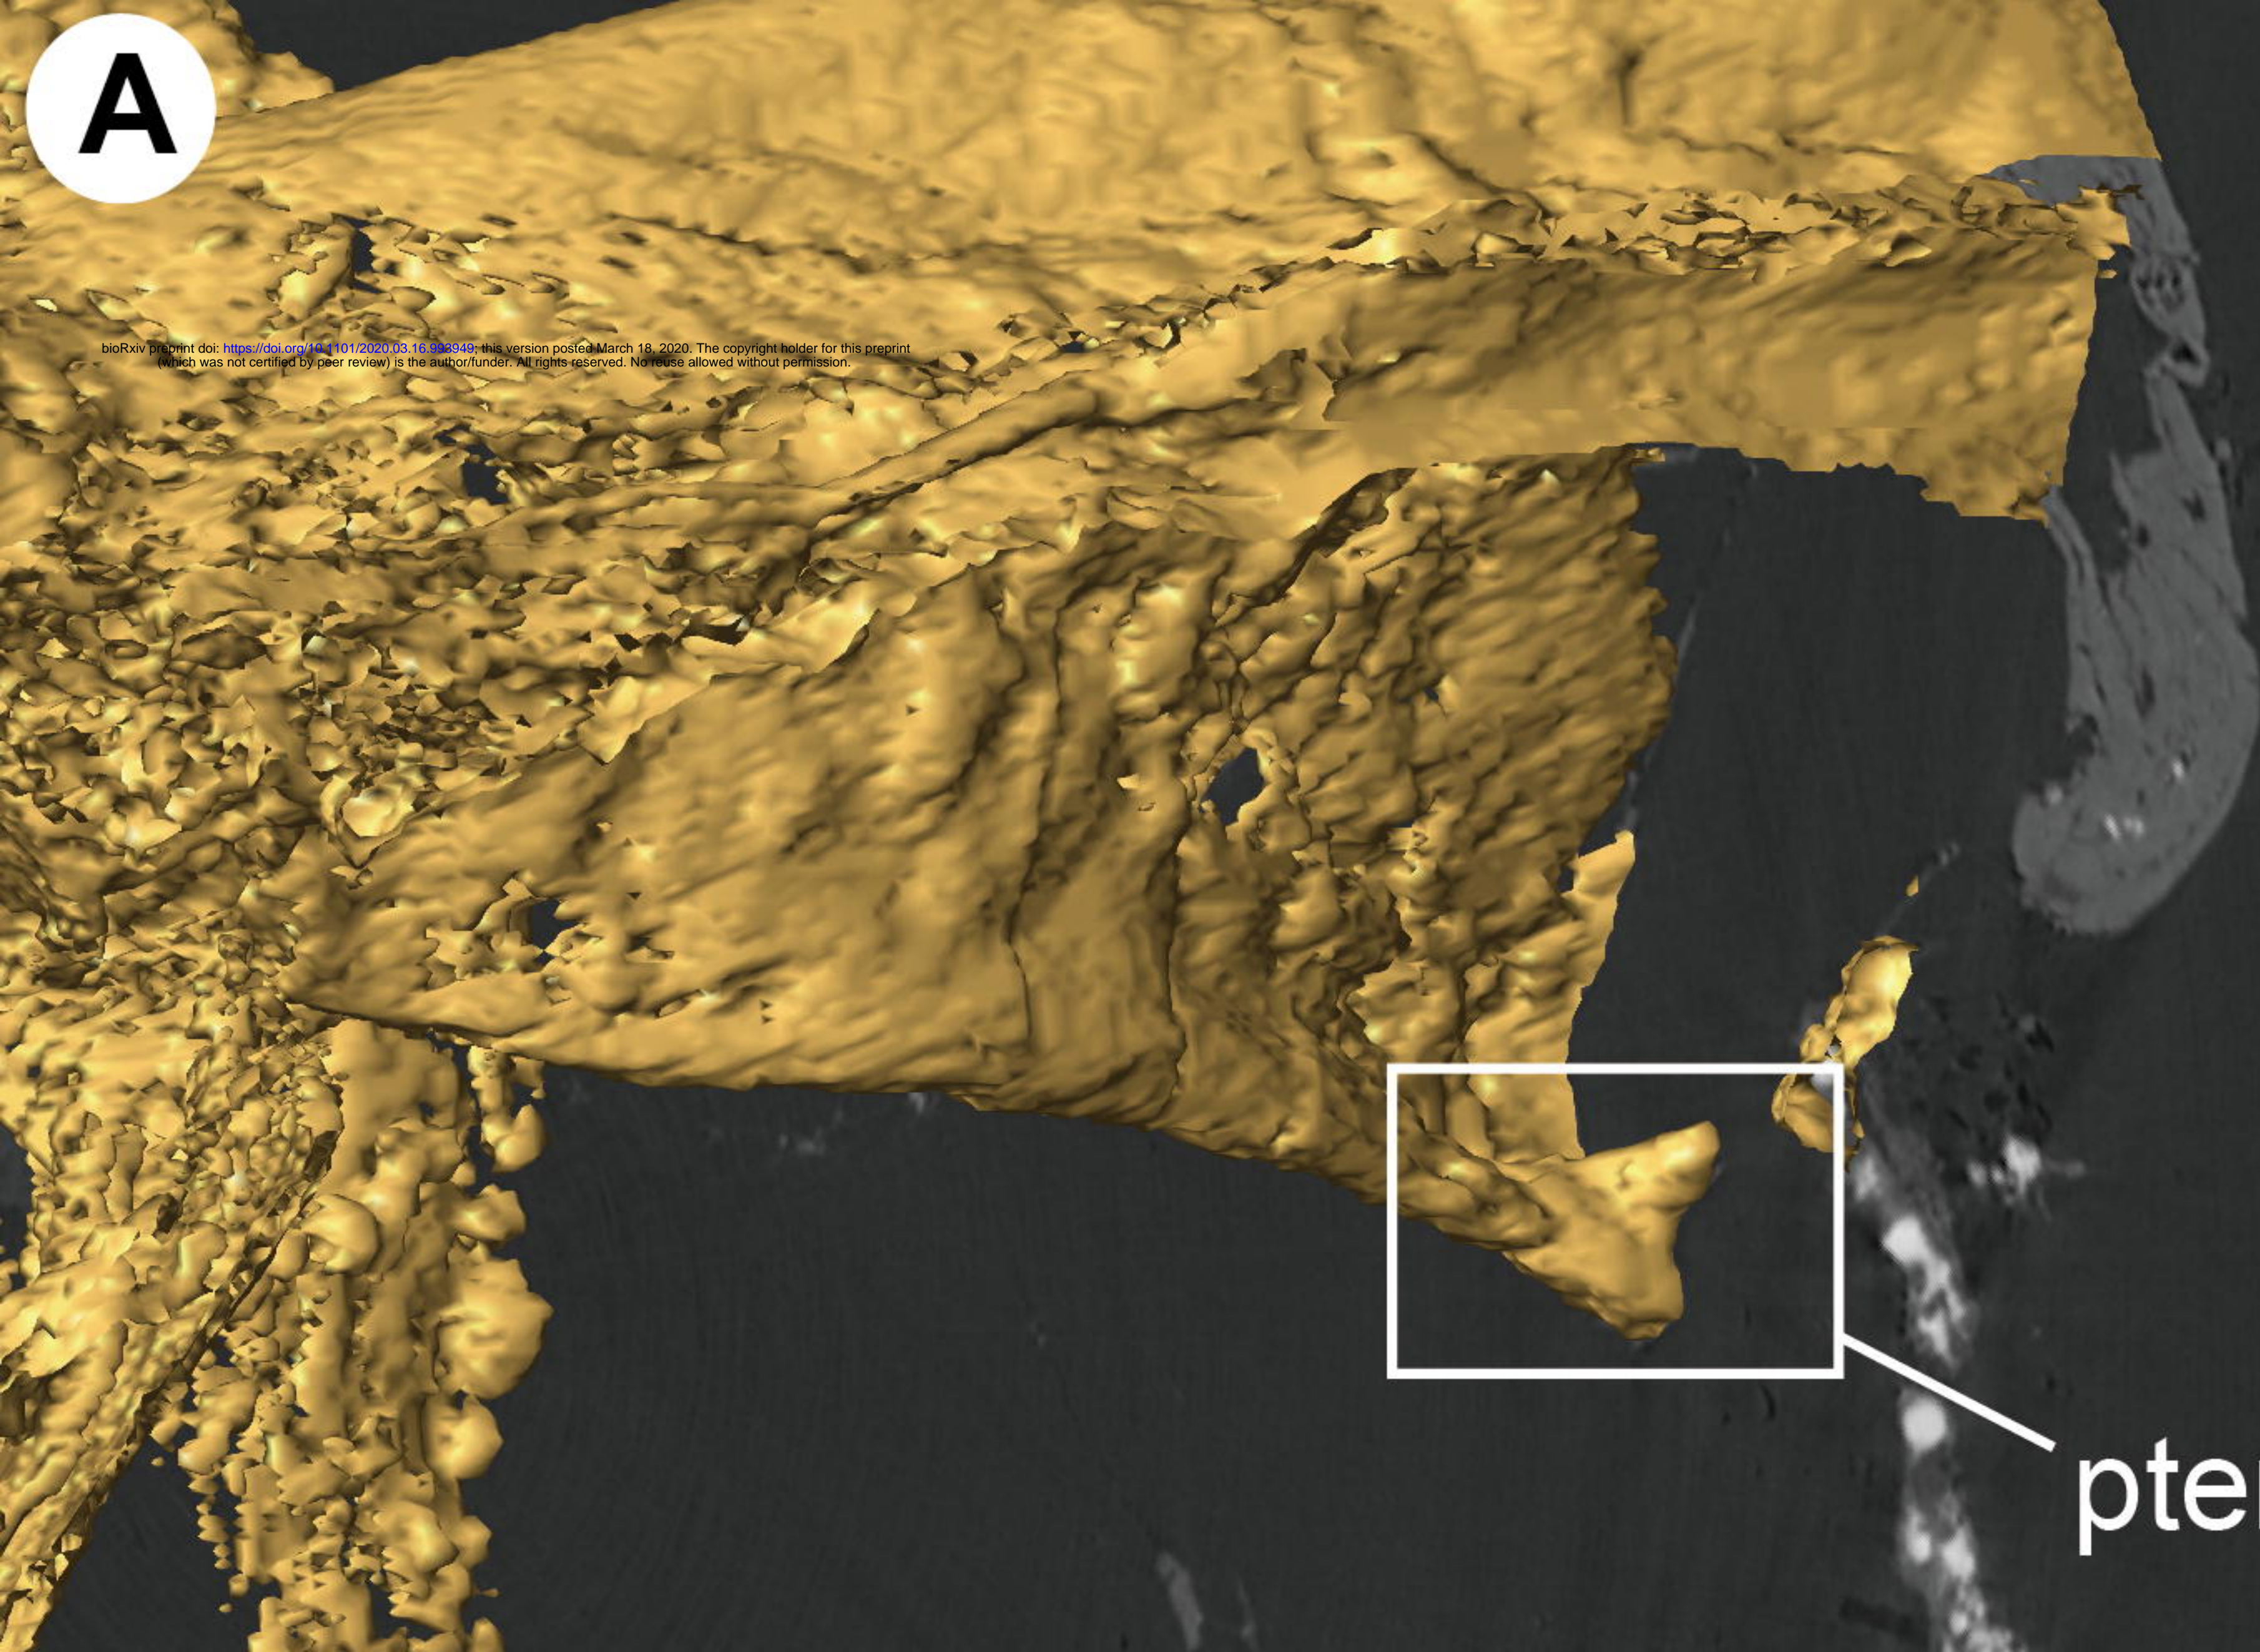

**B**

lower jaw

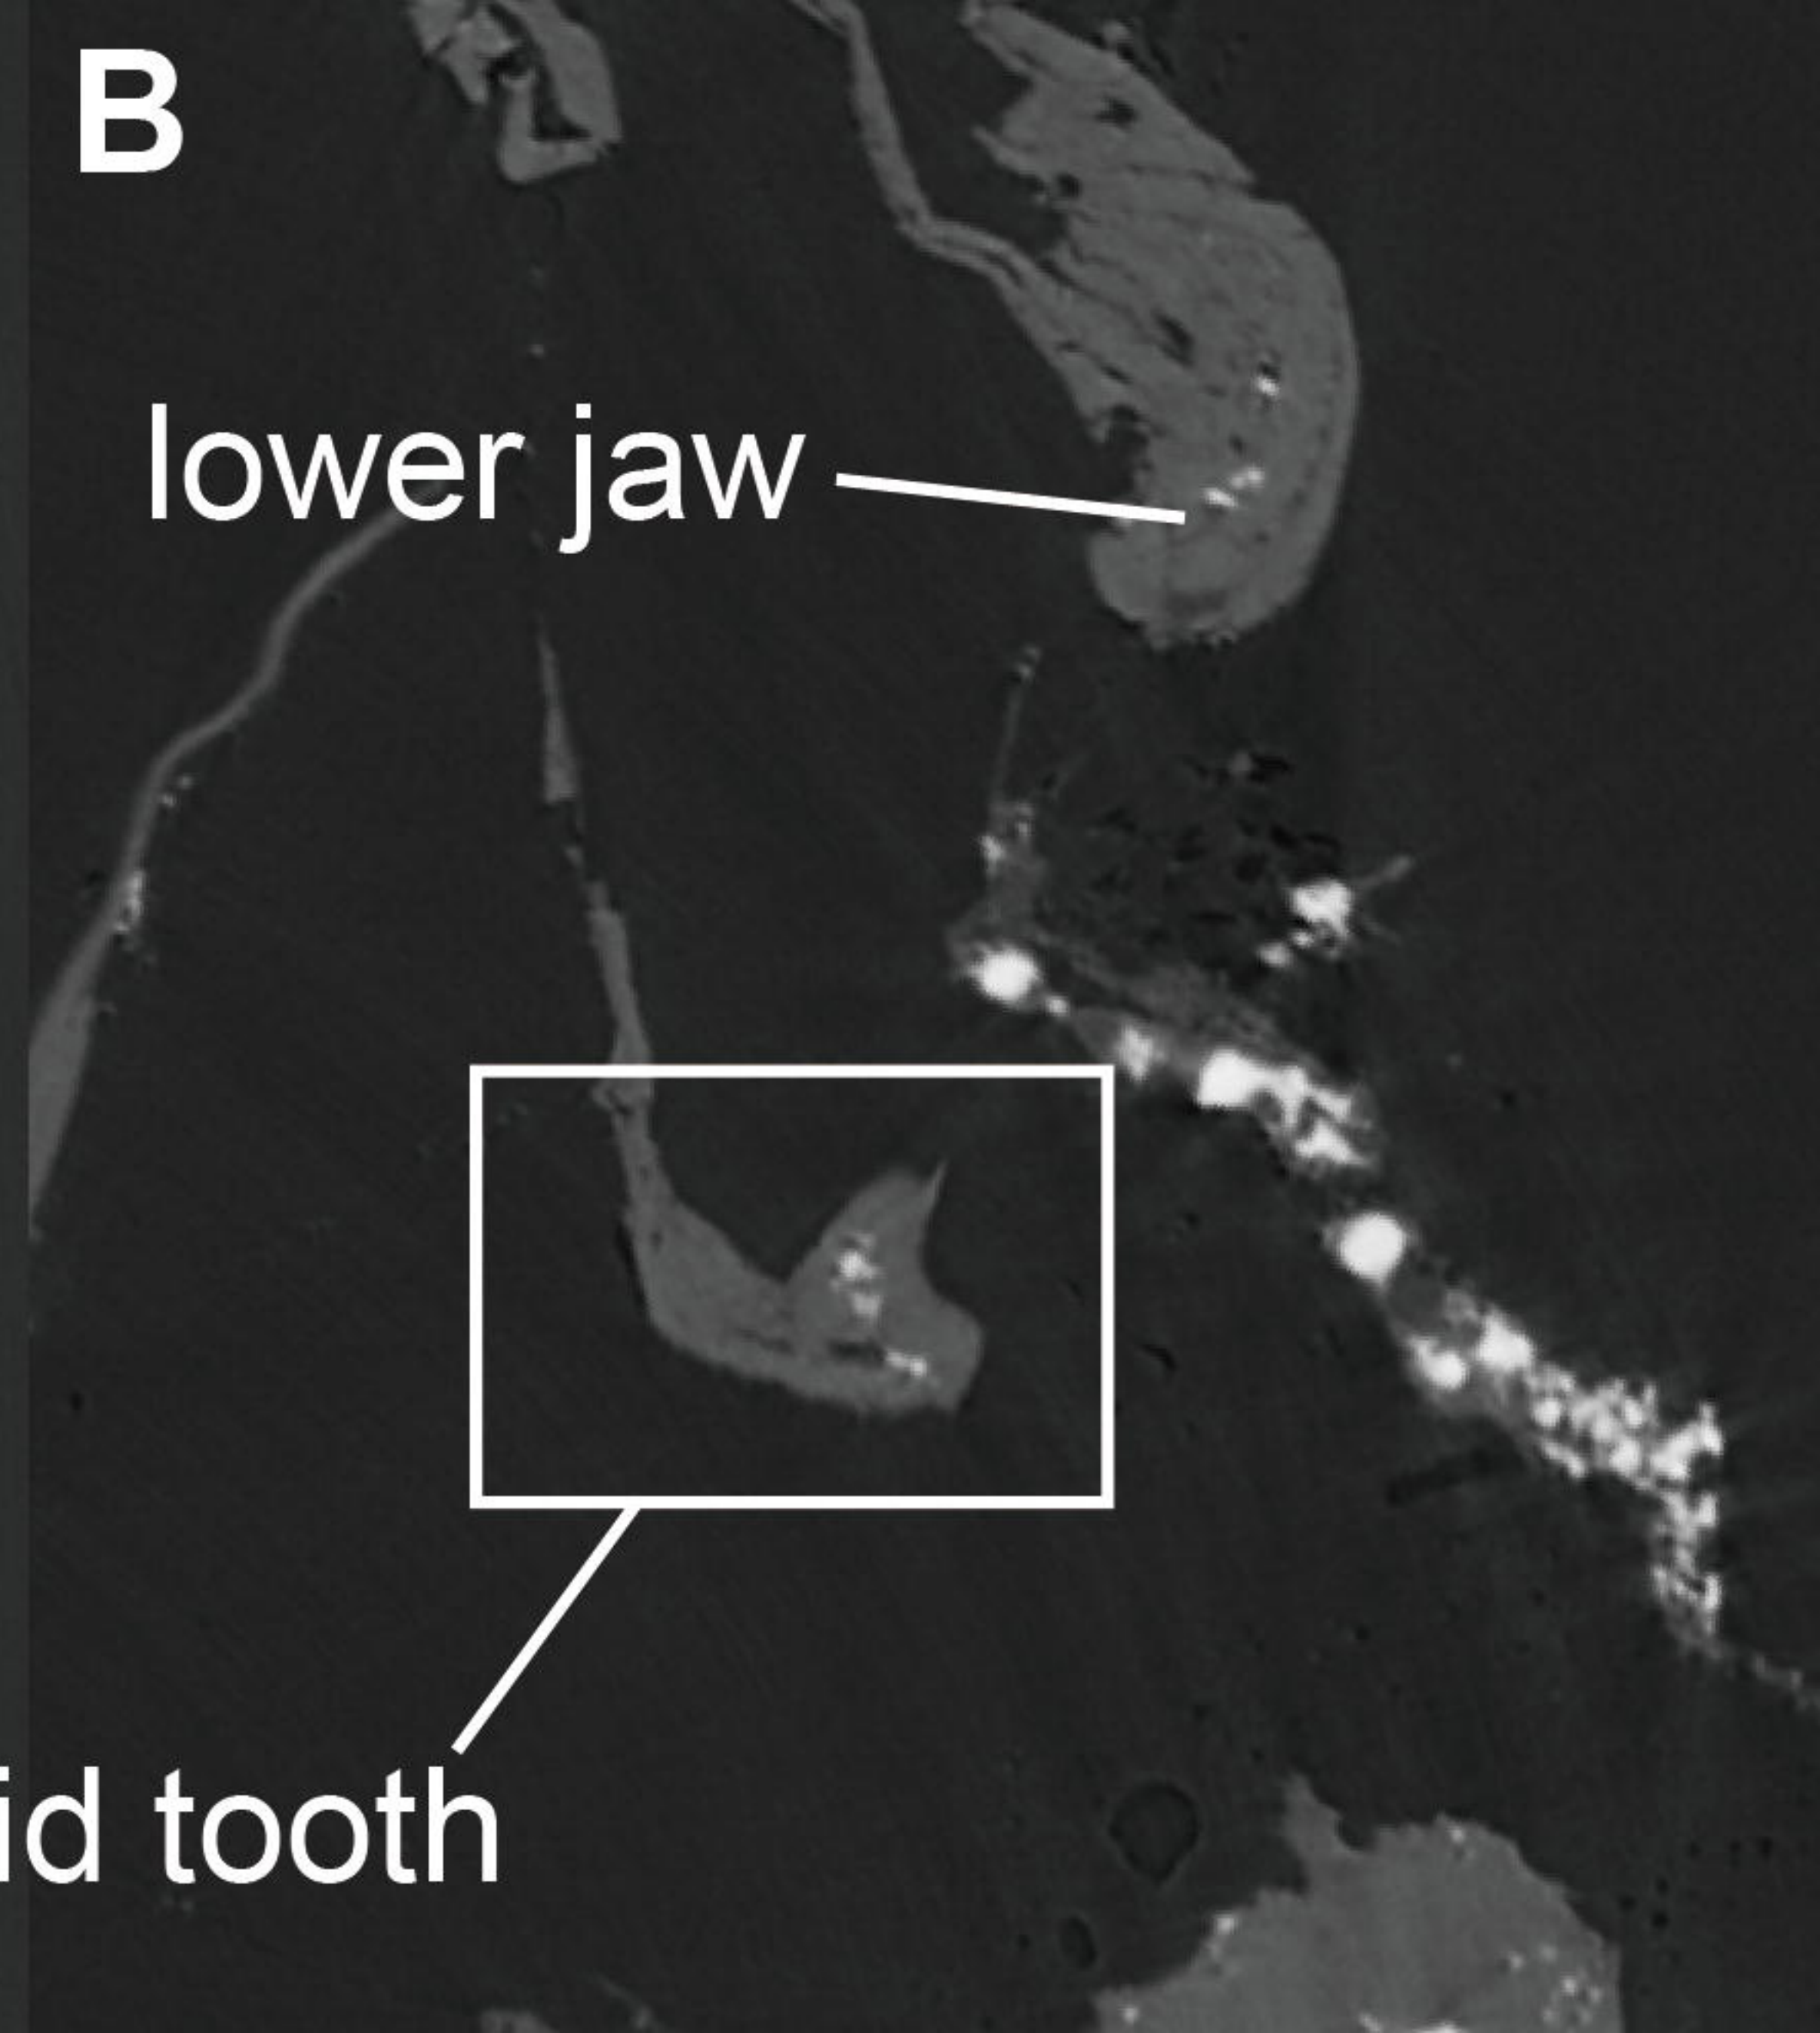

pterygoid tooth

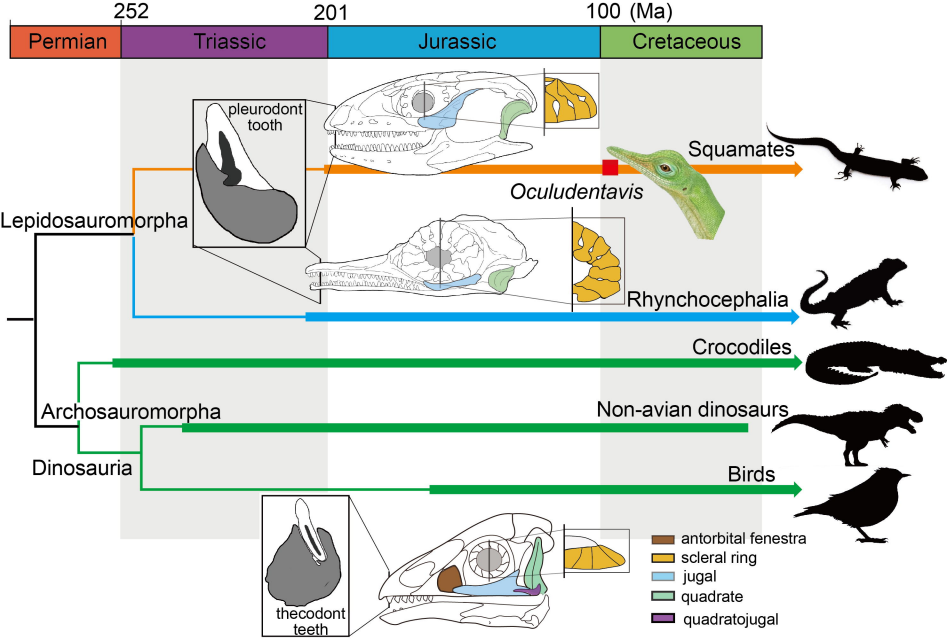

Source: https://www.biorxiv.org/content/biorxiv/early/2020/03/18/2020.03.16.993949.full.pdf
